Allegretti, Zimmerli et al

1 **Title: In cell architecture of the nuclear pore complex and snapshots of its**  
2 **turnover**

3  
4 **Authors:** Matteo Allegretti\*<sup>1</sup>, Christian E. Zimmerli\*<sup>1,2</sup>, Vasileios Rantos<sup>3</sup>, Florian Wilfling<sup>4</sup>,  
5 Paolo Ronchi<sup>5</sup>, Herman K.H. Fung<sup>1</sup>, Chia-Wei Lee<sup>4</sup>, Wim Hagen<sup>1</sup>, Beata Turonova<sup>1</sup>, Kai Karius<sup>3</sup>,  
6 Xiaojie Zhang<sup>1</sup>, Christoph Müller<sup>1</sup>, Yannick Schwab<sup>5,7</sup>, Julia Mahamid<sup>1,7</sup>, Boris Pfander<sup>4#</sup>, Jan  
7 Kosinski<sup>1,3#</sup>, and Martin Beck<sup>1,6,7#</sup>

8  
9 \* Contributed equally

10  
11 # correspondence to [bpfander@biochem.mpg.de](mailto:bpfander@biochem.mpg.de), [jan.kosinski@embl.de](mailto:jan.kosinski@embl.de) or  
12 [martin.beck@biophys.mpg.de](mailto:martin.beck@biophys.mpg.de)

13  
14 **Affiliations:**

15 1 Structural and Computational Biology Unit, European Molecular Biology Laboratory,  
16 Meyerhofstrasse 1, 69117, Heidelberg, Germany

17 2 Collaboration for joint PhD degree between EMBL and Heidelberg University, Faculty of  
18 Biosciences

19 3 Centre for Structural Systems Biology (CSSB), DESY and European Molecular Biology  
20 Laboratory, Notkestrasse 85, 22607, Hamburg, Germany

21 4 Max Planck Institute of Biochemistry, Am Klopferspitz 18, 82152, Martinsried, Germany

22 5 Electron Microscopy Core Facility (EMCF), European Molecular Biology Laboratory,  
23 Meyerhofstrasse 1, 69117, Heidelberg, Germany

24 6 Department of Molecular Sociology, Max Planck Institute of Biophysics, Max-von-Laue-  
25 Straße 3, 60438 Frankfurt am Main

26 7 Cell Biology and Biophysics Unit, European Molecular Biology Laboratory, Meyerhofstrasse  
27 1, 69117, Heidelberg, Germany

28  
29 **Keywords:** nuclear pore complex, cryo-FIB milling, cryo-electron tomography, autophagy,  
30 correlative light and electron microscopy

Allegretti, Zimmerli et al

31 **Summary:**

32 Nuclear pore complexes (NPCs) mediate exchange across the nuclear envelope. They consist of  
33 hundreds of proteins called nucleoporins (Nups) that assemble in multiple copies to fuse the inner  
34 and outer nuclear membranes. Elucidating the molecular function and architecture of NPCs  
35 imposes a formidable challenge and requires the convergence of *in vitro* and *in situ* approaches.  
36 How exactly NPC architecture accommodates processes such as mRNA export or NPC assembly  
37 and turnover inside of cells remains poorly understood. Here we combine integrated *in situ*  
38 structural biology, correlative light and electron microscopy with yeast genetics to structurally  
39 analyze NPCs within the native context of *Saccharomyces cerevisiae* cells under conditions of  
40 starvation and exponential growth. We find an unanticipated *in situ* layout of nucleoporins with  
41 respect to overall dimensions and conformation of the NPC scaffold that could not have been  
42 predicted from previous *in vitro* analysis. Particularly striking is the configuration of the Nup159  
43 complex, which appears critical to spatially accommodate not only mRNA export but also NPC  
44 turnover by selective autophagy. We capture structural snapshots of NPC turnover, revealing that  
45 it occurs through nuclear envelope herniae and NPC-containing nuclear vesicles. Our study  
46 provides the basis for understanding the various membrane remodeling events that happen at the  
47 interface of the nuclear envelope with the autophagy apparatus and emphasizes the need of  
48 investigating macromolecular complexes in their cellular context.

Allegretti, Zimmerli et al

49 **Text**

50 Nuclear pore complexes (NPCs) are giant macromolecular assemblies with a very intricate  
51 architecture. About 30 different genes termed nucleoporins (Nups) encode for components of  
52 NPCs. Scaffold Nups contain folded domains and form a cylindrical central channel. This channel  
53 is lined with FG-Nups, which harbor intrinsically disordered FG-rich repeats that interact with  
54 nuclear transport receptors. Nups assemble in multiple copies to form an eight-fold rotationally  
55 symmetric complex, totaling in ~550 protein building blocks in yeast and ~1000 in mammals<sup>1</sup>.  
56 The NPC consists of two outer rings, also called nuclear (NR) and cytoplasmic rings (CR), which  
57 are placed distally to the inner ring (IR) that resides at the fusion plane between the inner and outer  
58 nuclear membranes. Within the three-ringed architecture, Nups are organized into subcomplexes  
59 that form specific substructures. The Y-complex is the key scaffolding component of the outer  
60 rings, whereas the IR scaffold is built by the inner ring complex<sup>2</sup>. Further, the yeast Nup159  
61 complex (Nup214 complex in mammals) associates asymmetrically with the Y-complex at the CR  
62 and facilitates the terminal steps of mRNA export. Its core consists of two Nup159-Nup82-Nsp1  
63 heterotrimers that dimerize into a characteristic P-shaped structure<sup>3,4</sup>.

64 Several studies have highlighted that the accurate spatial positioning of the Nup159 complex with  
65 respect to the central channel at the cytoplasmic face of the NPC is critical for the spatial  
66 organization and directionality of mRNA export<sup>3,5,6</sup>. While mRNAs are chaperoned through the  
67 FG repeats within the central channel in a Mex67-dependent (but Ran independent) manner,  
68 exported mRNPs encounter the ATPase activity of the DEAD-box RNA helicase Dpb5 at the  
69 cytoplasmic face that removes Mex67 and ratchets the RNA into the cytoplasm<sup>1,6,7</sup>. Dpb5  
70 recruitment and positioning is ensured by the N-terminal beta propeller of Nup159, which is  
71 separated by a flexible linker from the C-terminal coiled coils that anchor Nup159 to the NPC  
72 scaffold<sup>7</sup>.

73 However, understanding how Nup subcomplexes are positioned to each other within the context  
74 of the nuclear membranes and the overall architecture of NPCs imposes a considerable challenge  
75 to structural biologists and requires the convergence of *in vitro* and *in situ* approaches<sup>8</sup>. While  
76 several high-resolution structures of Nups have been solved by X-ray crystallography, biochemical  
77 analysis and cross-linking mass spectrometry revealed the interaction topology. Cryo-electron  
78 microscopy (cryo-EM) maps provided an overall framework for the positioning of subcomplexes

Allegretti, Zimmerli et al

79 using systematic fitting approaches<sup>9,10,11,12,13</sup>. Cryo-electron tomography (cryo-ET) with  
80 subsequent subtomogram averaging is the method of choice to generate such cryo-EM maps,  
81 because it allows structural analysis of NPCs within the native context of the nuclear membranes  
82 that have to be considered as an integral part of their architecture. Such *in situ* structural analysis  
83 is available for both mammals and algae (reviewed in <sup>1</sup>) and revealed that key features of the NPC  
84 architecture, such as the stoichiometry of Y-complexes within the outer rings, are not conserved.  
85 Intriguingly, the P-shaped outline of the yeast Nup159 complex<sup>4</sup> was not apparent in any of the  
86 cryo-EM maps available to date, either suggesting structural diversity, or alternatively, questioning  
87 its physiological relevance.

88 To date, *in situ* structural analysis is still missing for the *S. cerevisiae* NPC (*ScNPC*), which has  
89 been extensively studied as a model organism not only for Nup structure, NPC architecture and  
90 the mechanism of mRNA export, but also NPC surveillance and turnover<sup>1,14</sup>. Thus far, only  
91 detergent extracted, purified NPC species have been analyzed<sup>13</sup> that bear neither the nuclear  
92 membranes nor any distinct features of Y-complexes (reviewed in <sup>1</sup>). An integrative model of the  
93 entire *ScNPC* architecture based on extensive experimental analysis *in vitro* has been recently put  
94 forward<sup>13</sup> and in principle could enable structure-to-function analyses based on the very powerful  
95 yeast genetics approaches. However, it remains unknown to what extent the native architecture of  
96 the *ScNPC* has been preserved *in vitro*. Therefore, there has been a pressing need to elucidate the  
97 spatial organization of subcomplexes of the *ScNPC in situ* within the cellular context.

#### 98 *Structural analysis of the ScNPC in the cellular context*

99 To characterize *ScNPC* architecture *in situ*, we prepared thin cryo-FIB lamellae of exponentially  
100 growing, plunge frozen cells<sup>15</sup>. We acquired 230 cryo-electron tomograms (Fig. 1a) containing  
101 ~500 *ScNPCs* and determined the structures by subtomogram averaging (see Methods). The  
102 resulting cryo-EM map at ~25 Å resolution (Extended Data Fig. 1a-b) provides the most detailed  
103 overview of the native configuration and conformation of subcomplexes of actively transporting  
104 NPCs in cells of any species to date (Fig. 1b-c, Extended Data Fig. 1b-c). A visual inspection of  
105 the structure reveals striking disparities, not only compared to the previously analyzed structures  
106 of the algal NPC<sup>10</sup> and human NPC<sup>9</sup> that likely account for species-specific differences, but also  
107 in comparison to previous cryo-EM maps of the biochemically isolated and detergent-extracted  
108 *ScNPC* (Extended Data Fig. 1c-d, Source Data 1 attached for review process). The previously



Allegretti, Zimmerli et al

109 published integrative model of one asymmetric unit of the IR<sup>13</sup> fits unambiguously into the  
110 observed density (p-value  $1.6 \times 10^{-12}$  Extended Data Fig. 2), however the model of the entire IR has  
111 to be dilated by ~20 nm in diameter in order to fit the *in situ* conformation (Extended Data Fig.  
112 3a), thereby spatially separating the eight individual spokes (Extended Data Fig. 3a). This analysis  
113 underlines the plasticity of the NPC within cells<sup>15</sup>, which might be physiologically relevant for the  
114 transport of large cargos and inner nuclear membrane proteins.

115 As expected<sup>13,16</sup>, 16 nuclear and cytoplasmic rings of Y-complexes are apparent in our cryo-EM  
116 map (Fig. 1c-d, Extended Data Fig. 1c), although some additional, yet unexplained density is  
117 observed in the nuclear ring. While the crystal structures and homology models of the yeast Y-  
118 complex vertex<sup>17</sup> (Sec13–Nup145C–Nup84–ScNup120–ScSeh1–ScNup85) or its fragments fit  
119 into the observed Y-shape density with significant p-values (Extended Data Fig. 2), the previous  
120 integrative model of the Y-complex<sup>13</sup> does not fit due to the curvature of its tail (Extended Data  
121 Fig. 3c). We therefore applied an integrative modeling procedure (Methods) to take the observed  
122 *in situ* conformation into account and obtained complete structures of the Y-complexes in both CR  
123 and NR. Due to the larger circumference of the NPC, the Y-complexes occupy a more extended  
124 conformation (Extended Data Fig. 3b). These findings further emphasize that the combination of  
125 *in vitro* and *in situ* structural analysis is essential to understand NPC architecture in physiological  
126 conditions.

127 A prominent feature of the CR, which remains yet unassigned after localization of the Y-  
128 complexes, is the P-shaped density of the Nup159 complex that is strikingly reminiscent of the  
129 previous *in vitro* analysis of the isolated, negatively stained Nup159 complex<sup>3,4</sup> (Fig. 2).  
130 Systematic fitting of the Nup159 complex negative stain map<sup>4</sup> into our *in situ* structure confirmed  
131 this fit (Fig. 2b, p-value 0.0027, Extended Data Fig. 4a, see Methods). Based on the top resulting  
132 fit, we superimposed a previously published representative integrative model of the Nup159  
133 complex<sup>3,13</sup> and we locally fit it into our cryo-EM map (Extended Data Fig. 4b). In comparison to  
134 previous architectural models of the entire ScNPC<sup>3,13</sup>, the P-shape is flipped around the axis that  
135 points towards the central channel (Extended Data Fig. 4b). Thereby, the Nup82  $\beta$ -propellers are  
136 positioned towards the inner ring (Extended Data Fig. 4b). The previous architectural model was  
137 in part guided by distance restraints from crosslinking mass spectrometry. In our updated Nup159  
138 complex configuration, all four of the previously published crosslinks<sup>13</sup> between the Nup159 and

Allegretti, Zimmerli et al

139 Y-complexes that could be mapped to the structure are satisfied (Extended Data Fig. 4e). The arm  
140 of the P-shape that consists of Nup159 DID tandem repeats binding multiple Dyn2 dimers<sup>4,18</sup> is  
141 clearly apparent *in situ* (Fig. 2). It projects towards the cytoplasm at an angle of  $\sim 45^\circ$  with respect  
142 to the nucleocytoplasmic axis (Fig. 2), while it had been previously thought to rather face the IR<sup>3</sup>  
143 (Extended Data Fig. 4b). Instead, the protein termini preceding FG-repeats of Nsp1 face the central  
144 channel.

145 *Yeast genetics confirms orientation of the RNA export platform*

146 To independently confirm this arrangement, we combined yeast genetics with *in situ* structural  
147 analysis. An important interactor of Nup82 is Nup116, one out of three yeast homologues of the  
148 essential vertebrate Nup98. This is a key Nup for establishing the NPC permeability barrier<sup>19,20</sup>,  
149 mRNA export<sup>6,19</sup> and pre-ribosome translocation<sup>21</sup>. It is also an architecturally critical linker Nup  
150 that connects the inner ring, Y and Nup159 complexes through short linear motifs in its  
151 intrinsically disordered domains<sup>12,22,23</sup>. We superimposed the crystal structure of Nup116(966-  
152 1111)-Nup82(1-452)-Nup159(1425-1458)<sup>24</sup> with the respective parts of two copies of Nup159 and  
153 Nup82 contained in the P-complex (Extended Data Fig. 4c-d). This analysis predicts that the  
154 autoproteolytic domain of Nup116 is placed into two yet unassigned densities that are proximate  
155 to each other and project towards Nup188 of the IR (Fig. 2c, Extended Data Figs. 4c-d and 5a).  
156 Crosslinking analysis<sup>13</sup> and previous biochemical data suggesting that Nup116 links to Nup188  
157 and Nup192 of the IR<sup>22,23</sup> agree well with this configuration (Extended Data Figs. 4e and 5a). To  
158 validate this assignment, we structurally analyzed the ScNPC in *nup116Δ* cells (knock-out, k. o.)  
159 cells at permissive temperature, at which NPCs have an ordinary morphological appearance in  
160 electron micrographs<sup>25</sup>. We acquired  $\sim 120$  tomograms and obtained a cryo-EM map as described  
161 above (see Methods). The *nup116Δ* structure lacks density exactly at positions proximate to  
162 Nup188 as predicted by superposition of the Nup116-Nup82-Nup159 X-ray structure (Fig. 2c and  
163 Extended Data Figs. 4c and 5c). This finding corroborates our spatial positioning of Nup116 at the  
164 interface between the IR and Nup159-complexes and previous biochemical work that has  
165 established Nup116 as a linker nucleoporin associated with the inner ring components<sup>22,23</sup>. The  
166 positioning of the two copies of Nup116 agrees with only one of the two that were previously  
167 assigned by integrative modeling<sup>13</sup> (Extended Data Fig. 5b). Our new model of NPC architecture  
168 spatiotemporally accommodates extensive biochemical analysis of mRNP export<sup>5,7,19</sup>. In fact, it

Allegretti, Zimmerli et al

169 places the FG-repeats that interact with Mex67 and are relevant earlier during the process, more  
170 towards the equatorial plane. Dbp5 and the N-terminus of Nup159 that facilitate the terminal  
171 release of Mex67 are positioned more towards the cytoplasm<sup>26</sup> (Fig. 2d).

172 *The Nup159 complex mediates selective autophagy through nuclear envelope herniae*

173 At nonpermissive temperature, the *nup116Δ* strain forms nuclear envelope (NE) herniae (Extended  
174 Data Fig. 6a), a phenotype in which NPCs are engulfed by the NE membranes and not accessible  
175 to the cytosol<sup>25</sup>. Interestingly, this phenotype was also observed when other Nup159 complex  
176 associated Nups, such as Gle2 were genetically perturbed<sup>27</sup>, and has been linked to the surveillance  
177 of NPC assembly by ESCRT proteins<sup>28,29</sup>. Since herniae were also observed under seemingly  
178 unrelated conditions, such as genetic perturbation of inner nuclear membrane proteins<sup>30,31</sup> in both  
179 yeast and human cells<sup>32</sup>, their exact functional relevance remained to be determined<sup>14,33</sup>. We  
180 wondered if NPC architecture under the herniae is altered and addressed this using cryo-FIB  
181 milling, cryo-ET (~40 tomograms) and subtomogram averaging of NPCs at the herniae basis in  
182 the *nup116Δ* strain at non-permissive temperature. We found that in these trapped NPCs not only  
183 Nup116, but the entire cytoplasmic ring, including the Nup159 and Y-complexes are missing  
184 (Extended Data Fig. 6c). Concurrently, the nuclear envelope is less curved at the fusion plane,  
185 which is typical for the neck of herniae (Extended Data Fig. 6a-c). This result is in line with models  
186 that conceptualize herniae as failed inside-out assembly intermediates of NPCs, in which the lack  
187 of fusion of the NE membranes prevented the assembly of the cytoplasmic components (reviewed  
188 in<sup>14,33</sup>). Another finding further corroborates this model. We noticed that as compared to WT cells,  
189 the NE of *nup116Δ* cells at permissive temperature contains a high number of mushroom-shape  
190 evagination of the inner nuclear membrane (Extended Data Fig. 6d-e). The structures are  
191 morphologically reminiscent of interphase assembly intermediates previously characterized in  
192 human cells<sup>34</sup>. These data point to a direct or indirect contribution of Nup116 to membrane fusion  
193 during NPC assembly.

194 A recent study identified Nup159 as an intrinsic receptor for selective autophagy of nuclear pores  
195 (Lee et al in revision; attached for review process). The AIM (Atg8-interacting motif), located  
196 proximate to the DID-Dyn2 arm of Nup159, mediates NPC turnover under conditions of low  
197 nitrogen supply. It recruits the ubiquitin-like autophagosomal protein Atg8 that is essential for

Allegretti, Zimmerli et al

198 anchoring autophagic protein cargo to autophagosomal membranes. Above findings suggest that  
199 the AIM is exposed into the cytoplasm together with the DID-Dyn2 arm (Fig. 3a), thus favoring  
200 the recruitment of cytoplasmic Atg8. We hypothesized that the herniae might be cleared by  
201 selective autophagy. This would make sense if they would not only occur upon genetic  
202 perturbation as previously observed, but also upon stress conditions that trigger autophagy, which  
203 was indeed the case. Under conditions of nitrogen starvation, NE herniae were observed, although  
204 they were less abundant as compared to the *nup116Δ* strain at nonpermissive temperature (Fig.  
205 3b). How exactly herniae clearance could be mediated by the AIM of Nup159 in the *nup116Δ*  
206 background is however not obvious because Nup159 complex should not be present at the herniae  
207 according to the NPC structure determined in *nup116Δ* cells at not permissive temperature  
208 (Extended Data Fig. 6c).

209 To visualize how the autophagy machinery is recruited to the NPC, we employed a split-Venus  
210 approach specifically targeting the Nup159-Atg8 interaction. To enhance autophagic clearance of  
211 spatially clustered NPCs, we used a *nup120Δ* background<sup>35</sup> as described in (Lee et al) but at shorter  
212 nitrogen starvation exposure (Fig. 3c-d and Extended Data Fig. 7a-b). We identified the regions of  
213 interest using correlative light and electron microscopy (CLEM) on plastic sections<sup>36</sup> and 3D cryo-  
214 CLEM<sup>37</sup>. We acquired tomograms at positions of NPCs engaged in Atg8 interaction. These data  
215 revealed that agglomerates of herniae were engulfed by additional double membranes (Fig. 3c-d  
216 and Supplementary Video 1). Concurrently, the membrane topology of the herniae was more  
217 complex and displayed NPCs budding out of the NE, indicating additional membrane remodeling  
218 (Fig. 3c-d, Extended Data Fig. 7a and Supplementary Video 1). Thereby, many NPCs and thus  
219 AIMs are exposed to the cytoplasm (Fig. 3c-d, Supplementary Video 1). This finding would  
220 predict that herniae initially form independently from Atg8, possibly in the context of NPC  
221 surveillance<sup>28</sup>. Indeed, herniae formed in *atg8Δ* cells exposed to nitrogen starvation (Fig. 3b and  
222 Extended Data Fig. 8). We further noted, that under conditions where hernia formation was  
223 triggered but not selective autophagy, as in the *nup116Δ* strain at non-permissive temperature  
224 without starvation, herniae accumulate (Fig. 3b, Extended Fig. 6a) and are also observed as NPC-  
225 containing nuclear vesicles in the cytoplasm (Fig. 4c, Extended Data Fig. 9c and Supplementary  
226 Video 2), which agrees with the biochemical analysis of Lee et al. Instead, under conditions in  
227 which selective autophagy is triggered by starvation, NPC-containing nuclear vesicles (~340 nm

Allegretti, Zimmerli et al

228 diameter) are surrounded by ribosomes and double membranes typical of autophagosomes (Fig.  
229 4e-f and Extended Data Figs 7c and 9e-f), that are *en route* towards the vacuole as demonstrated  
230 by Lee et al (Extended Data Fig. 9g). Taken together, we observed several snapshots of NPC  
231 turnover, although the transitions between them, such as the budding of herniae into nuclear  
232 vesicles or fusion of autophagosome-engulfed NPC-containing-nuclear-vesicles to the vacuole  
233 need to be further investigated in the future (Extended Data Fig. 9). It will be also interesting to  
234 elucidate if herniae triggered under alternative genetic conditions, also in human cells<sup>32</sup>, ultimately  
235 feed into the autophagy pathway.

236 In conclusion, our *in situ* structural analysis of ScNPC clarifies the layout of the major Nup  
237 subcomplexes under native conditions. It confirms the physiological relevance of the P-shaped  
238 configuration of the Nup159 complex but identifies an unexpected orientation with respect to the  
239 scaffold that accommodates both the terminal steps of mRNA export (Fig 2d) and exposure of the  
240 intrinsic AIM (Fig. 4d). Our findings highlight the power of in cell structural biology to provide  
241 novel insights into fundamental processes of eukaryotic life.

## 242 References

- 243 1. D. H. Lin, A. Hoelz, *Annu. Rev. Biochem.*, in press, doi:10.1146/annurev-biochem-  
244 062917-011901.
- 245 2. M. Beck, E. Hurt, The nuclear pore complex: Understanding its function through  
246 structural insight. *Nat. Rev. Mol. Cell Biol.* **18**, 73–89 (2017).
- 247 3. J. Fernandez-Martinez, S. J. Kim, Y. Shi, P. Upla, R. Pellarin, M. Gagnon, I. E.  
248 Chemmama, J. Wang, I. Nudelman, W. Zhang, R. Williams, W. J. Rice, D. L. Stokes, D.  
249 Zenklusen, B. T. Chait, A. Sali, M. P. Rout, Structure and Function of the Nuclear Pore  
250 Complex Cytoplasmic mRNA Export Platform. *Cell.* **167**, 1215-1228.e25 (2016).
- 251 4. M. Gaik, D. Flemming, A. Von Appen, P. Kastiris, N. Mücke, J. Fischer, P. Stelter, A.  
252 Ori, K. H. Bui, J. Baßler, E. Barbar, M. Beck, E. Hurt, Structural basis for assembly and  
253 function of the Nup82 complex in the nuclear pore scaffold. *J. Cell Biol.* **208**, 283–297  
254 (2015).
- 255 5. L. J. Terry, S. R. Wentz, Nuclear mRNA export requires specific FG nucleoporins for  
256 translocation through the nuclear pore complex. *J. Cell Biol.* **178**, 1121–1132 (2007).
- 257 6. R. L. Adams, L. J. Terry, S. R. Wentz, Nucleoporin FG domains facilitate mRNP  
258 remodeling at the cytoplasmic face of the nuclear pore complex. *Genetics.* **197**, 1213–  
259 1224 (2014).
- 260 7. C. S. Weirich, J. P. Erzberger, J. M. Berger, K. Weis, The N-terminal domain of Nup159  
261 forms a  $\beta$ -propeller that functions in mRNA export by tethering the helicase Dbp5 to the  
262 nuclear pore. *Mol. Cell.* **16**, 749–760 (2004).
- 263 8. A. Hoelz, J. S. Glavy, M. Beck, Toward the atomic structure of the nuclear pore complex:  
264 When top down meets bottom up. *Nat. Struct. Mol. Biol.* **23**, 624–630 (2016).
- 265 9. A. Von Appen, J. Kosinski, L. Sparks, A. Ori, A. L. DiGuilio, B. Vollmer, M. T.



- 266 Mackmull, N. Banterle, L. Parca, P. Kastritis, K. Buczak, S. Mosalaganti, W. Hagen, A.  
267 Andres-Pons, E. A. Lemke, P. Bork, W. Antonin, J. S. Glavy, K. H. Bui, M. Beck, In situ  
268 structural analysis of the human nuclear pore complex. *Nature*. **526**, 140–143 (2015).
- 269 10. S. Mosalaganti, J. Kosinski, S. Albert, M. Schaffer, D. Strenkert, P. A. Salomé, S. S.  
270 Merchant, J. M. Plitzko, W. Baumeister, B. D. Engel, M. Beck, In situ architecture of the  
271 algal nuclear pore complex. *Nat. Commun.* **9**, 1–8 (2018).
- 272 11. J. Kosinski, S. Mosalaganti, A. Von Appen, R. Teimer, A. L. Diguilio, W. Wan, K. H.  
273 Bui, W. J. H. Hagen, J. A. G. Briggs, J. S. Glavy, E. Hurt, M. Beck, Molecular  
274 architecture of the inner ring scaffold of the human nuclear pore complex. *Science (80-. )*.  
275 **352**, 363–365 (2016).
- 276 12. D. H. Lin, T. Stuwe, S. Schilbach, E. J. Rundlet, T. Perriches, G. Mobbs, Y. Fan, K.  
277 Thierbach, F. M. Huber, L. N. Collins, A. M. Davenport, Y. E. Jeon, A. Hoelz,  
278 Architecture of the symmetric core of the nuclear pore. *Science (80-. )*. **352** (2016),  
279 doi:10.1126/science.aaf1015.
- 280 13. S. J. Kim, J. Fernandez-Martinez, I. Nudelman, Y. Shi, W. Zhang, B. Raveh, T. Herricks,  
281 B. D. Slaughter, J. A. Hogan, P. Upla, I. E. Chemmama, R. Pellarin, I. Echeverria, M.  
282 Shivaraju, A. S. Chaudhury, J. Wang, R. Williams, J. R. Unruh, C. H. Greenberg, E. Y.  
283 Jacobs, Z. Yu, M. J. De La Cruz, R. Mironska, D. L. Stokes, J. D. Aitchison, M. F.  
284 Jarrold, J. L. Gerton, S. J. Ludtke, C. W. Akey, B. T. Chait, A. Sali, M. P. Rout,  
285 Integrative structure and functional anatomy of a nuclear pore complex. *Nature*. **555**, 475–  
286 482 (2018).
- 287 14. R. Ungricht, U. Kutay, Mechanisms and functions of nuclear envelope remodelling. *Nat.*  
288 *Rev. Mol. Cell Biol.* **18**, 229–245 (2017).
- 289 15. J. Mahamid, S. Pfeffer, M. Schaffer, E. Villa, R. Danev, L. K. Cuellar, F. Förster, A. A.  
290 Hyman, J. M. Plitzko, W. Baumeister, Visualizing the molecular sociology at the HeLa  
291 cell nuclear periphery. *Science (80-. )*. **351**, 969–972 (2016).
- 292 16. S. Rajoo, P. Vallotton, E. Onischenko, K. Weis, Stoichiometry and compositional  
293 plasticity of the yeast nuclear pore complex revealed by quantitative fluorescence  
294 microscopy. *Proc. Natl. Acad. Sci. U. S. A.* **115**, E3969–E3977 (2018).
- 295 17. T. Stuwe, A. R. Correia, D. H. Lin, M. Paduch, V. T. Lu, A. A. Kossiakoff, A. Hoelz,  
296 Architecture of the nuclear pore complex coat. *Science (80-. )*. **347**, 1148–1152 (2015).
- 297 18. P. Stelter, R. Kunze, D. Flemming, D. Höpfner, M. Diepholz, P. Philippsen, B. Böttcher,  
298 E. Hurt, Molecular basis for the functional interaction of dynein light chain with the  
299 nuclear-pore complex. *Nat. Cell Biol.* **9**, 788–796 (2007).
- 300 19. L. A. Strawn, T. Shen, S. R. Wentz, The GLFG Regions of Nup116p and Nup100p Serve  
301 as Binding Sites for Both Kap95p and Mex67p at the Nuclear Pore Complex. *J. Biol.*  
302 *Chem.* **276**, 6445–6452 (2001).
- 303 20. H. B. Schmidt, D. Görlich, Nup98 FG domains from diverse species spontaneously phase-  
304 separate into particles with nuclear pore-like permselectivity. *Elife*. **4**, 1–30 (2015).
- 305 21. T. Stage-Zimmermann, U. Schmidt, P. A. Silver, Factors Affecting Nuclear Export of the  
306 60S Ribosomal Subunit In Vivo. *Mol. Biol. Cell.* **11**, 3777–3789 (2000).
- 307 22. J. Fischer, R. Teimer, S. Amlacher, R. Kunze, E. Hurt, Linker Nups connect the nuclear  
308 pore complex inner ring with the outer ring and transport channel. *Nat. Struct. Mol. Biol.*  
309 **22**, 774–781 (2015).
- 310 23. E. Onischenko, J. H. Tang, K. R. Andersen, K. E. Knockenhauer, P. Vallotton, C. P.  
311 Derrer, A. Kralt, C. F. Mugler, L. Y. Chan, T. U. Schwartz, K. Weis, Natively Unfolded

- 312 FG Repeats Stabilize the Structure of the Nuclear Pore Complex. *Cell*. **171**, 904-917.e19  
313 (2017).
- 314 24. K. Yoshida, H.-S. Seo, E. W. Debler, G. Blobel, A. Hoelz, Structural and functional  
315 analysis of an essential nucleoporin heterotrimer on the cytoplasmic face of the nuclear  
316 pore complex. *Proc. Natl. Acad. Sci.* **108**, 16571–16576 (2011).
- 317 25. S. R. Wentge, G. Blobel, A Temperature-sensitive A Temperature-sensitive NUP116 Null  
318 Mutant Forms a Nuclear Envelope Seal over the Yeast Nuclear Pore Complex Thereby  
319 Blocking Nucleocytoplasmic Traffic. *J. Cell Biol.* **123**, 275–284 (1993).
- 320 26. P. Vallotton, S. Rajoo, M. Wojtynek, E. Onischenko, A. Kralt, C. P. Derrer, K. Weis,  
321 Mapping the native organization of the yeast nuclear pore complex using nuclear radial  
322 intensity measurements. *Proc. Natl. Acad. Sci.*, 201903764 (2019).
- 323 27. R. Murphy, J. L. Watkins, S. R. Wentge, GLE2, a *Saccharomyces cerevisiae* homologue of  
324 the *Schizosaccharomyces pombe* export factor RAE1, is required for nuclear pore  
325 complex structure and function. *Mol. Biol. Cell*. **7**, 1921–1937 (1996).
- 326 28. B. M. Webster, P. Colombi, J. Jäger, C. Patrick Lusk, Surveillance of nuclear pore  
327 complex assembly by ESCRT-III/Vps4. *Cell*. **159**, 388–401 (2014).
- 328 29. B. M. Webster, D. J. Thaller, J. Jäger, S. E. Ochmann, S. Borah, C. P. Lusk, Chm7 and  
329 Heh1 collaborate to link nuclear pore complex quality control with nuclear envelope  
330 sealing. *EMBO J.* **35**, 2447–2467 (2016).
- 331 30. J. J. Scarcelli, C. A. Hodge, C. N. Cole, The yeast integral membrane protein Apq12  
332 potentially links membrane dynamics to assembly of nuclear pore complexes. *J. Cell Biol.*  
333 **178**, 799–812 (2007).
- 334 31. W. Zhang, A. Neuner, D. Rütznick, T. Sachsenheimer, C. Lüchtenborg, B. Brügger, E.  
335 Schiebel, Brr6 and Brl1 locate to nuclear pore complex assembly sites to promote their  
336 biogenesis. *J. Cell Biol.* **217**, 877–894 (2018).
- 337 32. E. Laudermitch, P.-L. Tsai, M. Graham, E. Turner, C. Zhao, C. Schlieker, Dissecting  
338 Torsin/cofactor function at the nuclear envelope: a genetic study. *Mol. Biol. Cell*. **27**,  
339 3964–3971 (2016).
- 340 33. D. J. Thaller, C. Patrick Lusk, Fantastic nuclear envelope herniations and where to find  
341 them. *Biochem. Soc. Trans.* **46**, 877–889 (2018).
- 342 34. S. Otsuka, K. H. Bui, M. Schorb, M. Julius Hossain, A. Z. Politi, B. Koch, M. Eltsov, M.  
343 Beck, J. Ellenberg, Nuclear pore assembly proceeds by an inside-out extrusion of the  
344 nuclear envelope. *Elife*. **5**, 1–23 (2016).
- 345 35. J. D. Aitchison, G. Blobel, M. P. Rout, Nup120p : A Yeast Nucleoporin Required for. **131**,  
346 1659–1675 (1995).
- 347 36. W. Kukulski, M. Schorb, S. Welsch, A. Picco, M. Kaksonen, J. A. G. Briggs, Correlated  
348 fluorescence and 3D electron microscopy with high sensitivity and spatial precision. *J.*  
349 *Cell Biol.* **192**, 111–119 (2011).
- 350 37. J. Arnold, J. Mahamid, V. Lucic, A. De Marco, J. J. Fernandez, T. Laugks, T. Mayer, A.  
351 A. Hyman, W. Baumeister, J. M. Plitzko, Site-Specific Cryo-focused Ion Beam Sample  
352 Preparation Guided by 3D Correlative Microscopy. *Biophys. J.* **110**, 860–869 (2016).
- 353



354 **Figures**

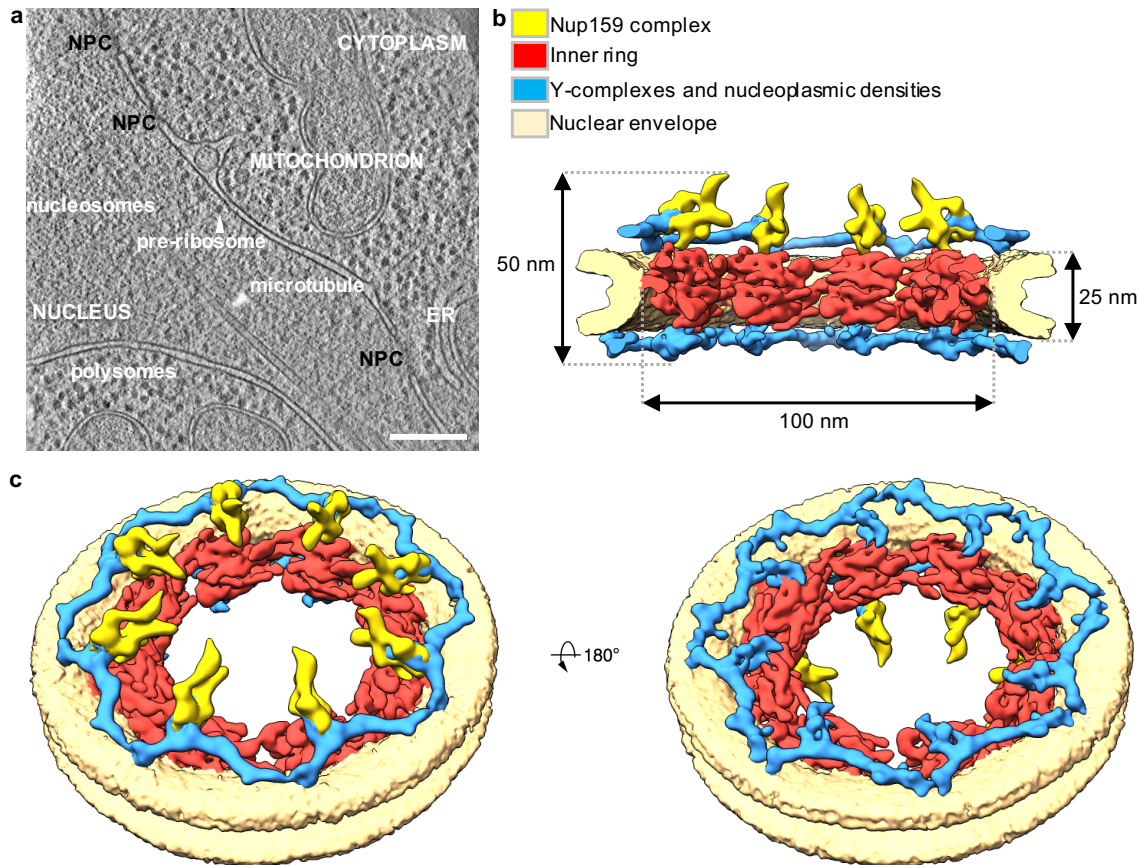

355  
356 **Fig. 1: In cell structure of *S. cerevisiae* NPC.** **a**, Tomographic slice of a *S. cerevisiae* cell during  
357 division. Scale bar 200 nm. **b**, Segmentation of the cryo-EM map of the *Sc*NPC cut in half. **c**,  
358 Tilted view of the entire NPC showing both the cytoplasmic (left) and the nucleoplasmic (right)  
359 face.

360  
361  
362  
363  
364  
365  
366

Allegretti, Zimmerli et al

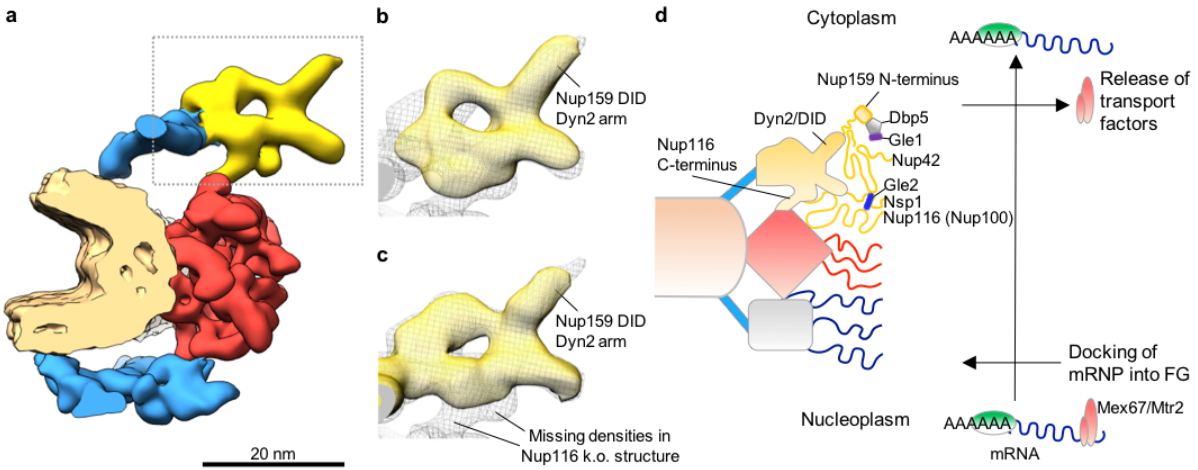

367  
368 **Fig. 2: Nup159 complex architecture.** **a**, Individual spoke of the *ScNPC* (color-code as in Fig.  
369 1). Nup159 complex is highlighted with a dotted frame. **b**, Nup159 complex region of the in cell  
370 *ScNPC* map (gray mesh) superimposed with the top scoring systematic fit (see Methods) of the  
371 negative stain map of the Nup159 complex<sup>4</sup> (yellow surface). **c**, Same as **b** but superimposed with  
372 the in cell *ScNPC* map of a *nup116Δ* strain grown at permissive temperature (yellow surface). **d**,  
373 Spatial model of how mRNA export is accommodated by the orientation of the Nup159 complex.  
374 A poly-A mRNA with transport factors Mex67/Mtr2 (red) and proteins that protect the poly-A tail  
375 from degradation (light green) docks to the unstructured region of the basket Nups<sup>5</sup> (grey box with  
376 blue filaments). Nup159 N-terminal domain that mediates the release of the transport factors from  
377 the mRNA<sup>7</sup> is anchored at the cytoplasmic side.  
378

Allegretti, Zimmerli et al

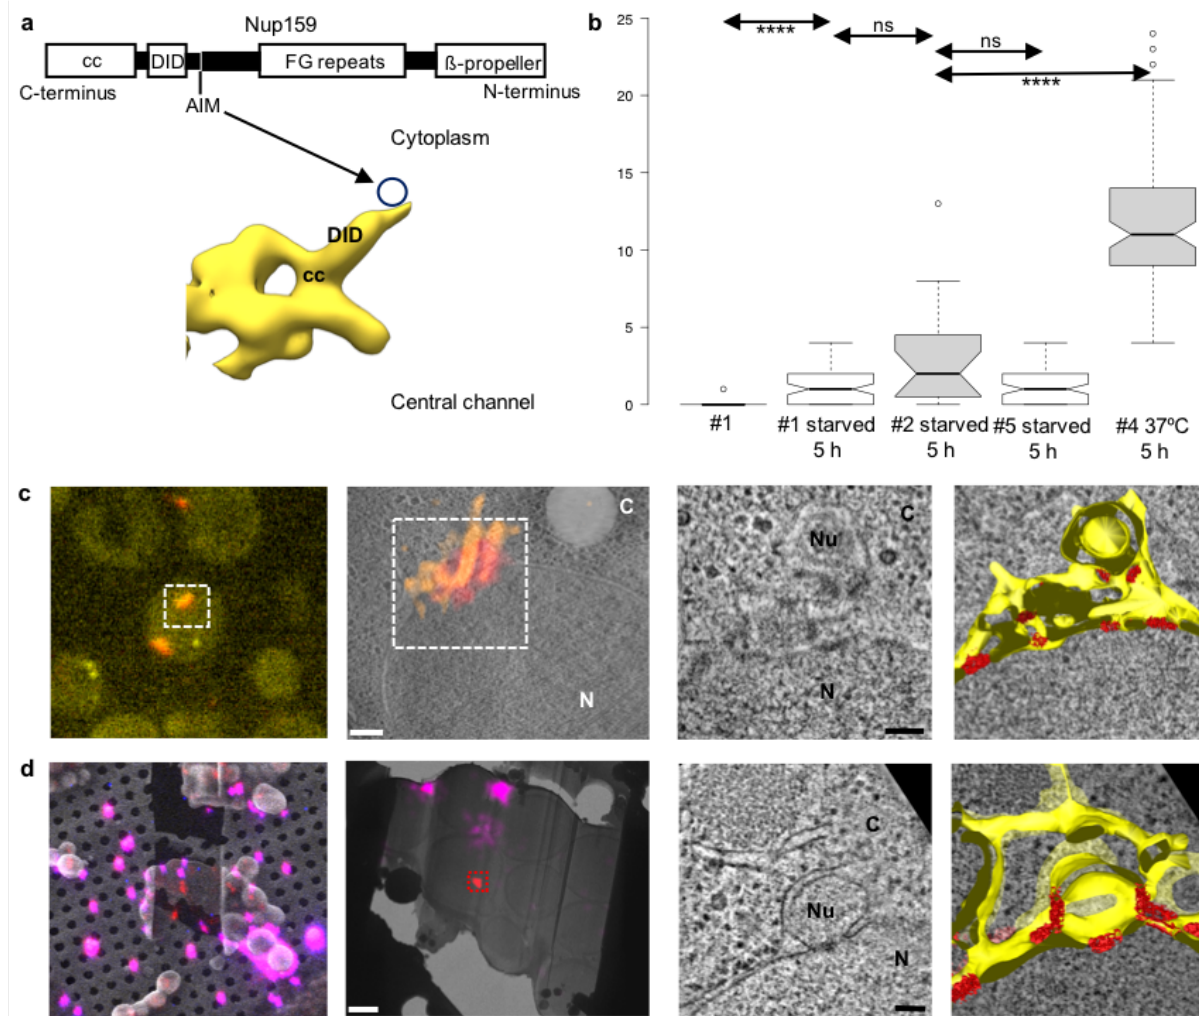

379  
 380 **Fig. 3: Cellular visualization of Nup159-Atg8 interaction by CLEM.** **a**, Domain structure of  
 381 Nup159 with corresponding map showing the position of the Atg8 interacting motif (AIM) (Lee  
 382 et al). **b**, Box plot (median, 1st quartile) showing the number of herniae (see Methods) in *S.*  
 383 *cerevisiae* strains before and after starvation according to Extended Data Table 1 (#1 control cells;  
 384 #2 Nup159-Atg8-splitVenus, Nup170-Mars, *nup120Δ* cells; #4 *nup116Δ* cells; #5 *atg8Δ* cells).  
 385 *nup116Δ* cells (#4) were shifted to the non-permissive Temperature of 37°C; herniae are induced  
 386 (\*\*\*\*  $p < 0.0001$ ; Mann Whitney, two-sided). **c**, On section CLEM of strain #2 after 5.5h of  
 387 starvation. The left panel shows the light microscopy signal on plastic section. SplitVenus signal  
 388 arising from the interaction of Nup159 with Atg8 is shown in yellow. Nup170-Mars is shown in  
 389 red. The second panel zooms in the area of interest (white dashed square in the previous panel)  
 390 showing the overlay of the fluorescent signal on the tomographic EM slice. Scale bar: 200 nm.  
 391 The framed area is shown as tomographic slice and segmented on the right (N nucleus; C  
 392 cytoplasm; Nu nucleoplasm; scale bar: 100 nm; NPCs in red; membranes in yellow). **d**, 3D cryo-  
 393 CLEM of strain #2 after 5.5 h of starvation. SEM top view of a lamella with overlaid fluorescent  
 394 signal. Red is NPC signal; magenta is fiducial-bead signal. Second panel: cryo-TEM overview (~2

Allegretti, Zimmerli et al

395 nm/pix) of the same lamella. Scale bar: 2  $\mu$ m. The framed area is shown as tomographic slice and  
396 segmented on the right. Scale bar: 100 nm.  
397

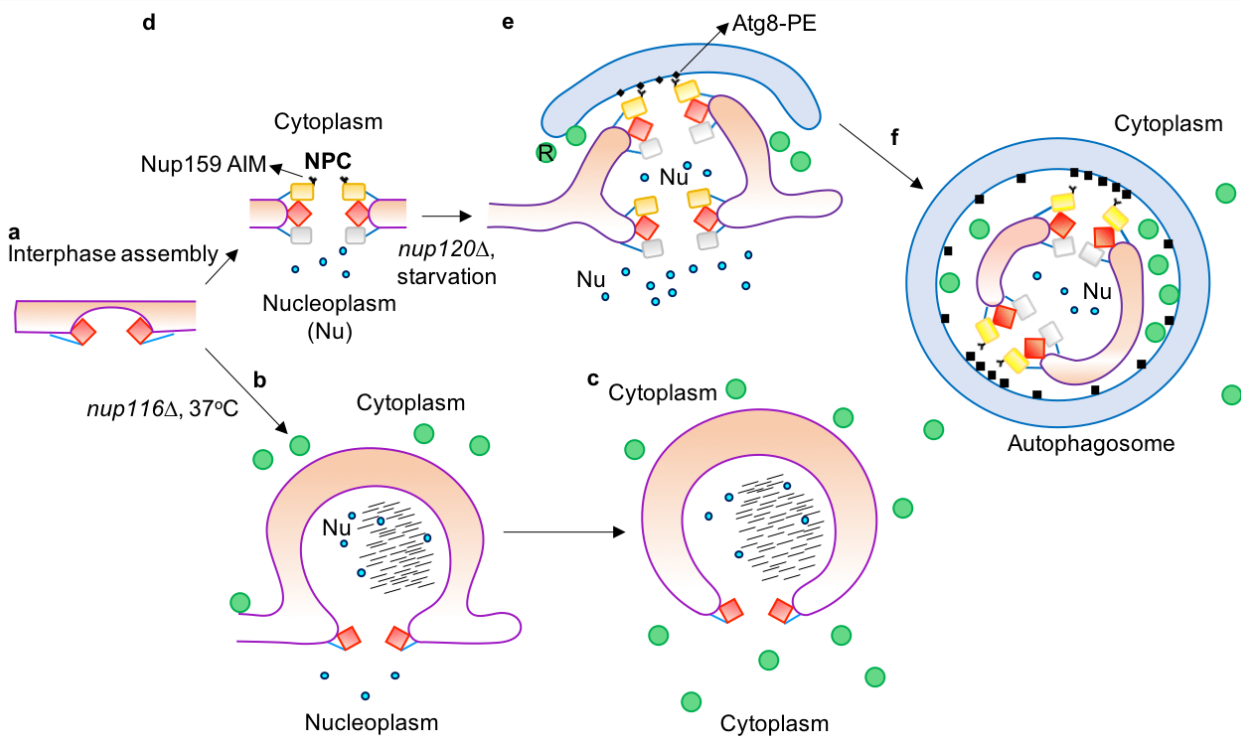

398  
399 **Fig. 4: Cartoon model of membrane remodeling during NPC turnover by selective**  
400 **autophagy.** **a**, Inside-out assembly intermediates<sup>34</sup> or inner nuclear membrane evaginations  
401 (Extended Data Fig. 6d) progress into **b**, NE herniae as in the *nup116Δ* strain at non-permissive  
402 temperature (Extended Data Fig. 6a); or mature into **d**, fully assembled NPCs. **e**, When autophagy  
403 is triggered by Nitrogen starvation (or NPC clustering), NPCs are cytoplasmically exposed at the  
404 herniations by membrane remodeling (Fig. 3 c-d, Supplementary Video 1). Nup159 AIM interacts  
405 with Atg8 and double membranes are recruited to the nuclear envelope. **c**, If hernia accumulation  
406 is enforced in *nup116Δ* cells at non permissive temperature, nuclear vesicles are observed in the  
407 cytosol. **e**, **f**, If autophagy is triggered, nuclear vesicles are engulfed by double membranes  
408 (Extended Data Fig. 7c) and, as shown by Lee et al, ultimately end up in the lysosome (Extended  
409 Data Fig. 9g). Color-code as in Fig. 2d. R is ribosome depicted as a green circle; black lines  
410 represent dark densities visible in the cryo-tomograms.



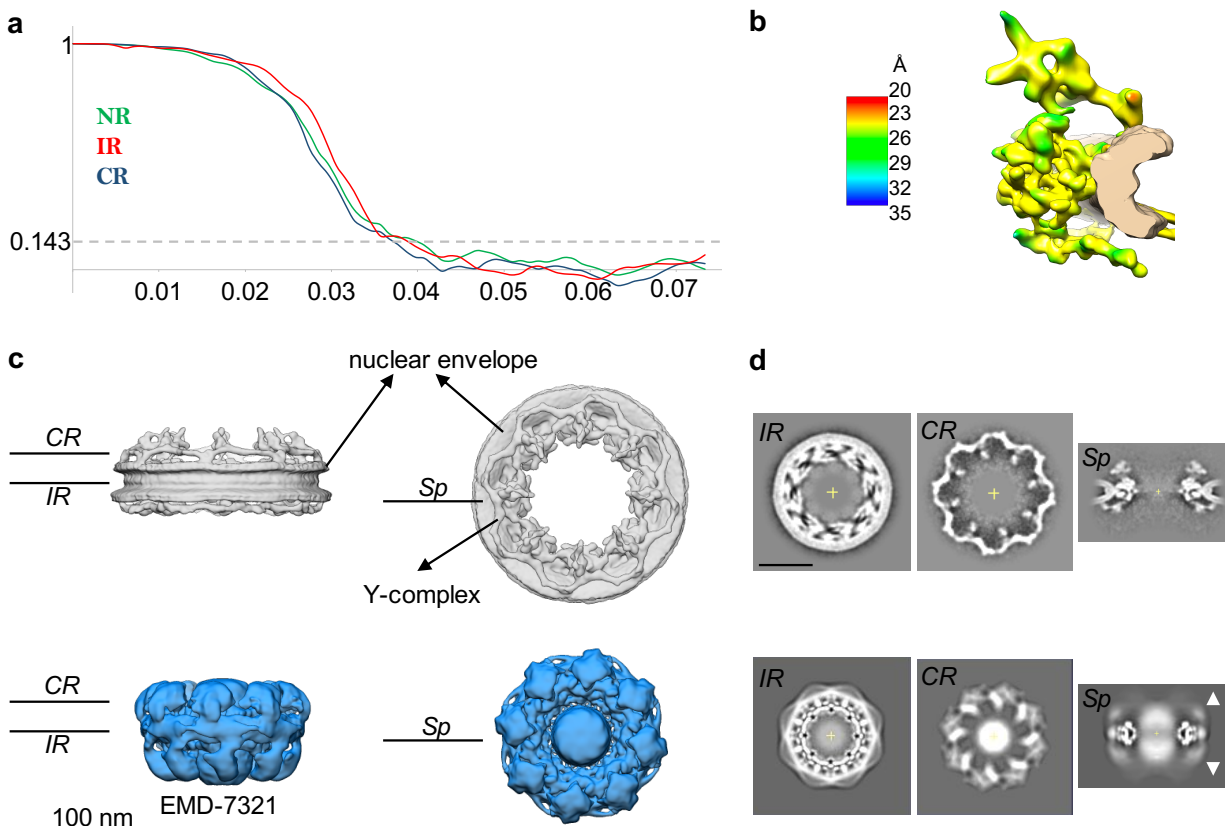

411  
 412 **Extended Data Fig. 1: In cell structure of the *Sc*NPC vs detergent-extracted *Sc*NPC (EMD-**  
 413 **7321).** **a**, Gold standard FSCs of in cell cryo-EM map of the *Sc*NPC. All the curves (nuclear ring  
 414 NR, cytoplasmic ring CR, inner ring IR) intersect the 0.143 criterium at around 25 Å resolution.  
 415 **b**, Local resolution analysis<sup>51</sup> with color-coded bar. **c**, In cell cryo-EM map (gray) in comparison  
 416 to cryo-EM map of detergent-extracted *Sc*NPCs (blue, EMD-7321 at the suggested contour level)  
 417 show significant differences in diameter and in interpretable features. The nuclear membranes and  
 418 the Y-complexes are clearly discerned in the in cell cryo-EM map, in contrast to EMD-7321. **d**,  
 419 Slices through the maps at the level of the cytoplasmic (CR) and inner rings (IR) and an individual  
 420 spoke (Sp). Lines in **c** indicate slicing position shown in **d**. Arrowheads indicate blurred features  
 421 in the outer rings. Scale bar: 50 nm. See also: Source Data 1 attached for review process.

IR, fitted structure: Yeast IR complex (PDB DEV ID: 00000010)

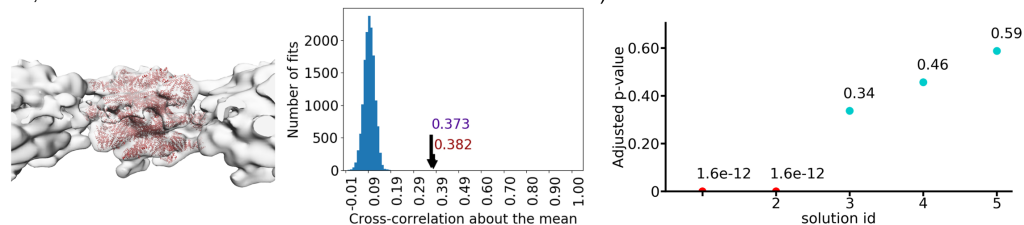

CR, fitted structure: Yeast Y complex (PDB ID: 4XMM)

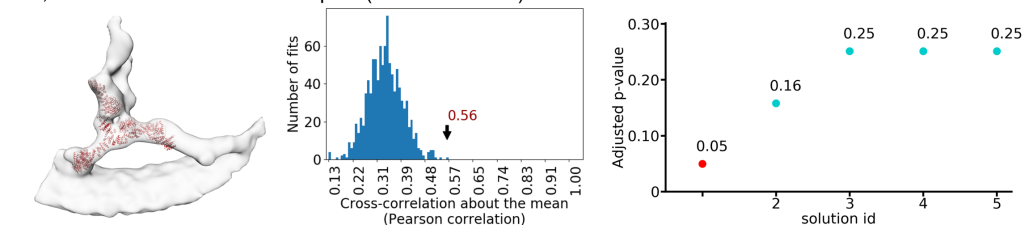

NR, fitted structure: Yeast Y complex (PDB ID: 4XMM)

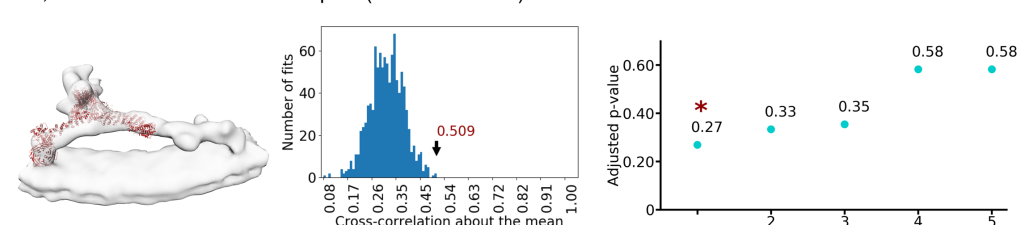

CR, fitted structure: Yeast Sec13-Nup145C-Nup84 complex (PDB ID: 3IKO)

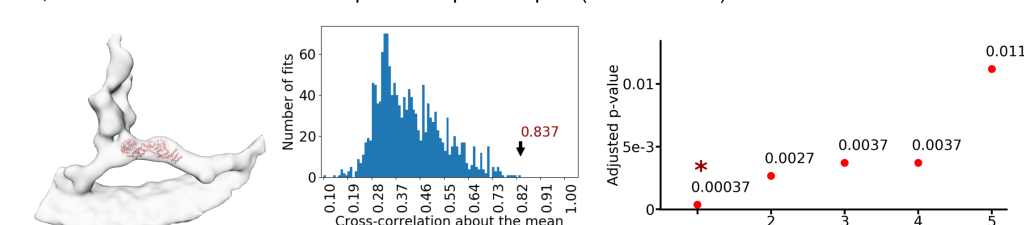

NR, fitted structure: Yeast Sec13-Nup145C-Nup84 complex (PDB ID: 3IKO)

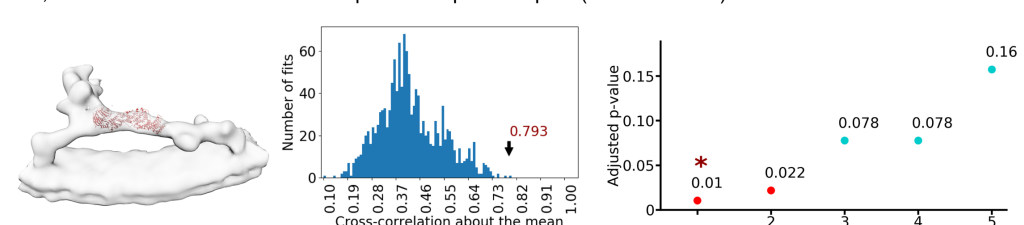

NR, fitted structure: Yeast Nup84-Nup133 complex (homology model, Fernandez-Martinez, 2016)

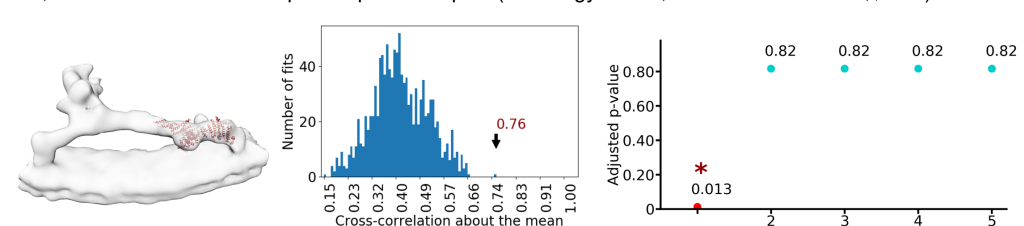

422  
423  
424

**Extended Data Fig. 2: Systematic fitting of inner and outer ring components into the ScNPC map.** Each row shows the visualization of the most significant fits (left), the histogram of raw

425 scores (middle), and a plot of the top five p-values (right). The statistically significant fits (p-value  
426  $< 0.05$ , assessed as described in Methods) or the first top fit are marked with asterisk. The number  
427 of sampled fits used to calculate p-values after clustering of similar solutions was 14348, 1015,  
428 1039, 1479, 1354, and 1183 for the rows from top to bottom. For the IR, the integrative model of  
429 the single spoke of the IR<sup>13</sup> was used as the fitted structure. For the outer rings (CR and NR), the  
430 crystal structure of the yeast Y-complex was fitted or its parts corresponding to subcomplexes. The  
431 structures were fitted by an unbiased global search using UCSF Chimera<sup>52</sup> and scored using the  
432 cross-correlation score about the mean as explained in the Methods. The IR complex was fitted to  
433 the entire spoke map, while the other structures were fitted to individual CR and NR segments.



434

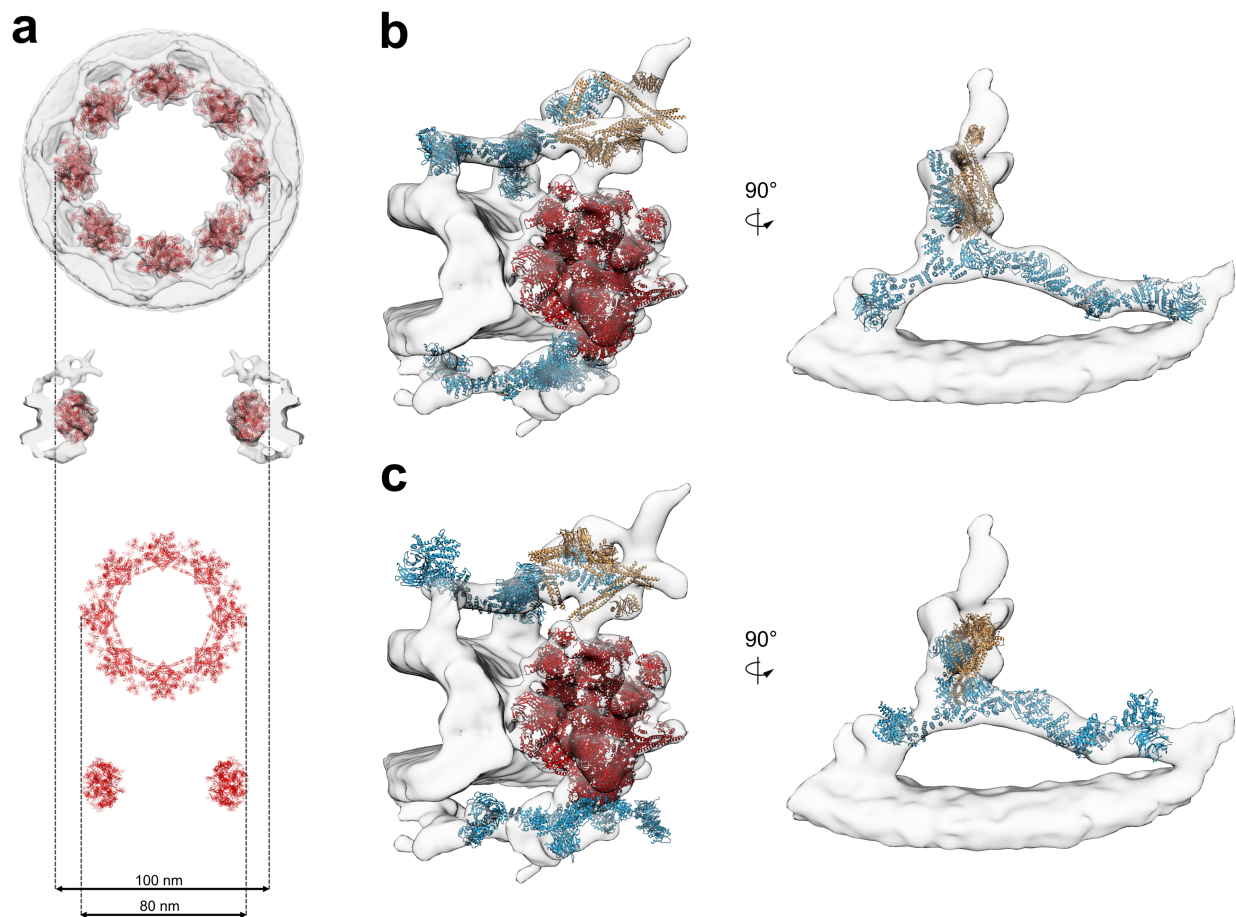

435

436 **Extended Data Fig. 3: Architectural model of ScNPC.** **a**, Comparison of fitted (to the cryo-ET  
 437 map from this study, depicted in gray) integrative Inner Ring complex (IRC) models (red ribbons)  
 438 from<sup>13</sup> with 20 nm diameter difference. **b**, Representative structural models of CR and NR Y-  
 439 complex (blue ribbons), P-complex (yellow ribbons) and IR (red ribbons) built in this work (see  
 440 Methods). The Y-complexes are more extended as compared to reference <sup>13</sup> version by ~40 Å. **c**,  
 441 Representative integrative structural models of CR and NR Y-complex (blue ribbons), P-complex  
 442 (yellow ribbons) and inner ring complex (red ribbons) from <sup>13</sup> fitted to cryo-ET map (grey density)  
 443 from this study, with respect to spatial reference frame from <sup>13</sup>.

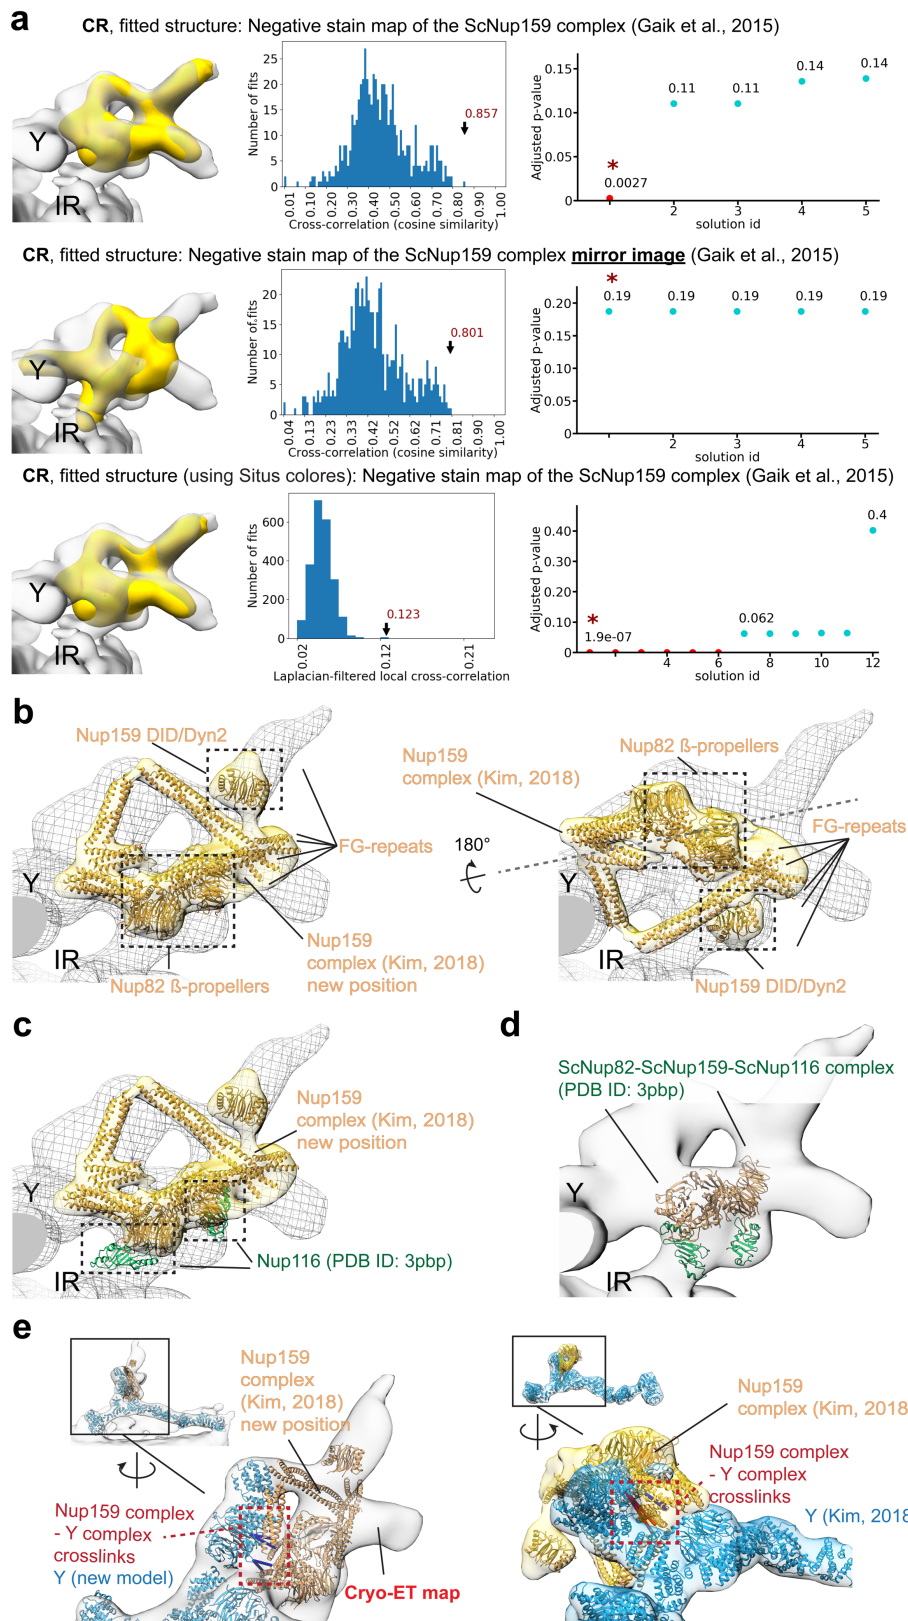

444  
 445 **Extended Data Fig. 4: Validation of the orientation of the Nup159 complex.** a, Systematic  
 446 fitting of the negative stain map of the Nup159 complex into the ScNPC map using UCSF

447 Chimera<sup>52</sup> and Colores program from the Situs package<sup>54</sup>. For comparison, both mirror images of  
448 the negative stain map (yellow) were fitted and only single one led to significant scores,  
449 underlining the unambiguous nature of the fit. Each row shows the visualization of the most  
450 significant fits (left), the histogram of raw scores (middle), and a plot of the top five p-values  
451 (right). The statistically significant fits (p-value < 0.05, assessed as described in Methods) or the  
452 first top fit are marked with asterisk. The number of sampled fits used to calculate p-values after  
453 clustering of similar solutions was 585, 599, and 2243, for top, middle, and bottom rows  
454 respectively. **b**, Representative integrative Nup159 complex model from<sup>13</sup> inside the in cell ScNPC  
455 map (gray mesh) in the orientation determined in this work (*left*) versus the previously published  
456 orientation (*right*). The Nup159 complex model is shown in orange ribbons within yellow  
457 localization probability density locally fitted (with UCSF Chimera<sup>52</sup>). The previous orientation  
458 was reproduced by first fitting the entire model from<sup>13</sup> to the in cell cryo-EM map and then locally  
459 fitting the Nup159 complex to the density (which was needed to bring the Nup159 complex into  
460 the density and preserved the orientation). The dashed gray line indicates the flipping axis between  
461 the two fits. **c**, Superimposition of the crystal structure 3PBP<sup>24</sup> onto representative integrative  
462 Nup159 complex model from reference<sup>13</sup> in the newly determined orientation (left) predicts the  
463 position of Nup116, as confirmed by our knock-out study (Fig. 2c). **d**, Visualization of two of the  
464 top resulting systematic fits of the 3PBP crystal structure into the cryo-ET map presented in this  
465 study confirms our *nup116Δ* structure (Fig. 2c). **e**, Crosslinks between the Nup159 complex and  
466 the Y complex from<sup>13</sup> support the new orientation (left) compared to the published orientation  
467 (right). Satisfied and violated crosslinks are depicted as blue and red bars, respectively.

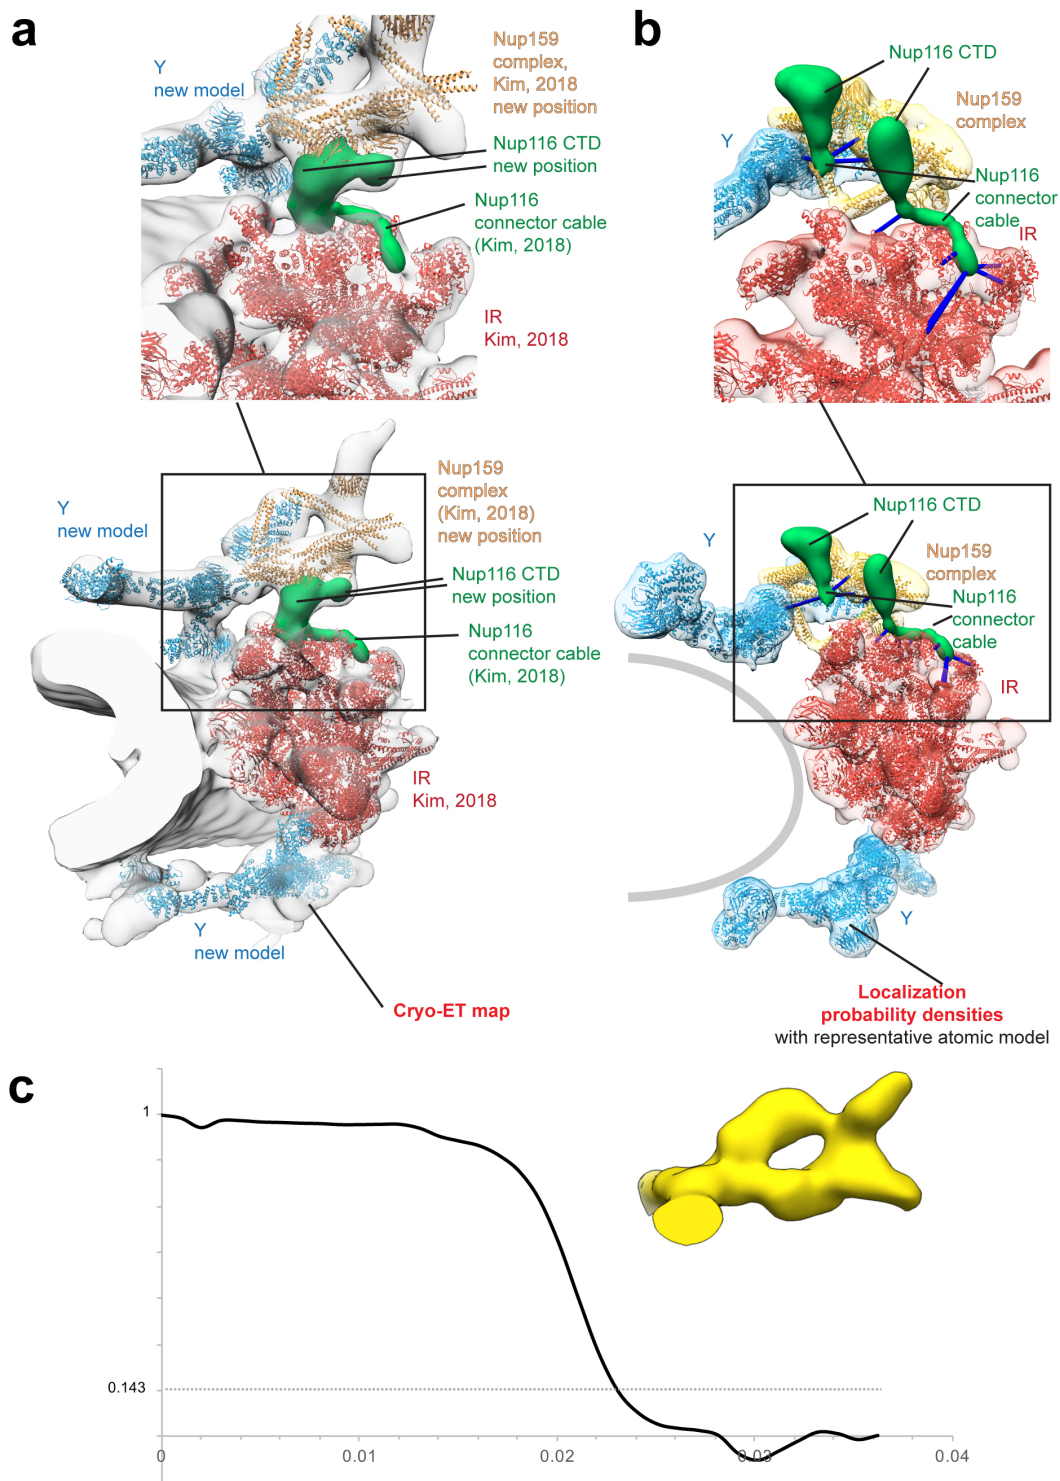

468  
 469 **Extended Data Fig. 5: Nup116 positioning.** a, New positioning of the Nup116 (left) versus  
 470 previously published integrative model (PDB DEV ID: 00000010 from<sup>13</sup>, right). The two *Sc*NPC  
 471 models were superimposed such that the IRs are aligned to the same reference frame. The Nup116  
 472 position is shown either as the density assigned to Nup116 based on the Nup116 knock-out  
 473 structure (left) or as localization probability densities retrieved from reference<sup>13</sup> model (right). The

474 major structural elements of the NPC are indicated. The Nup116 connector cable in the in cell  
475 model (left) has been taken from reference <sup>13</sup> based on its position relatively to the IR. Blue bars  
476 represent crosslinks from <sup>13</sup> from Nup116 to other Nups. For the in cell model, the cryo-ET map  
477 is displayed; for the model from <sup>13</sup>, the localization probability densities (not an EM map) are  
478 shown instead. **b**, FSC of *nup116Δ* cytoplasmic filaments structure intersects the 0.143 line at ~40  
479 Å, the cryo map is depicted in yellow as in Fig. 2c.  
480



481

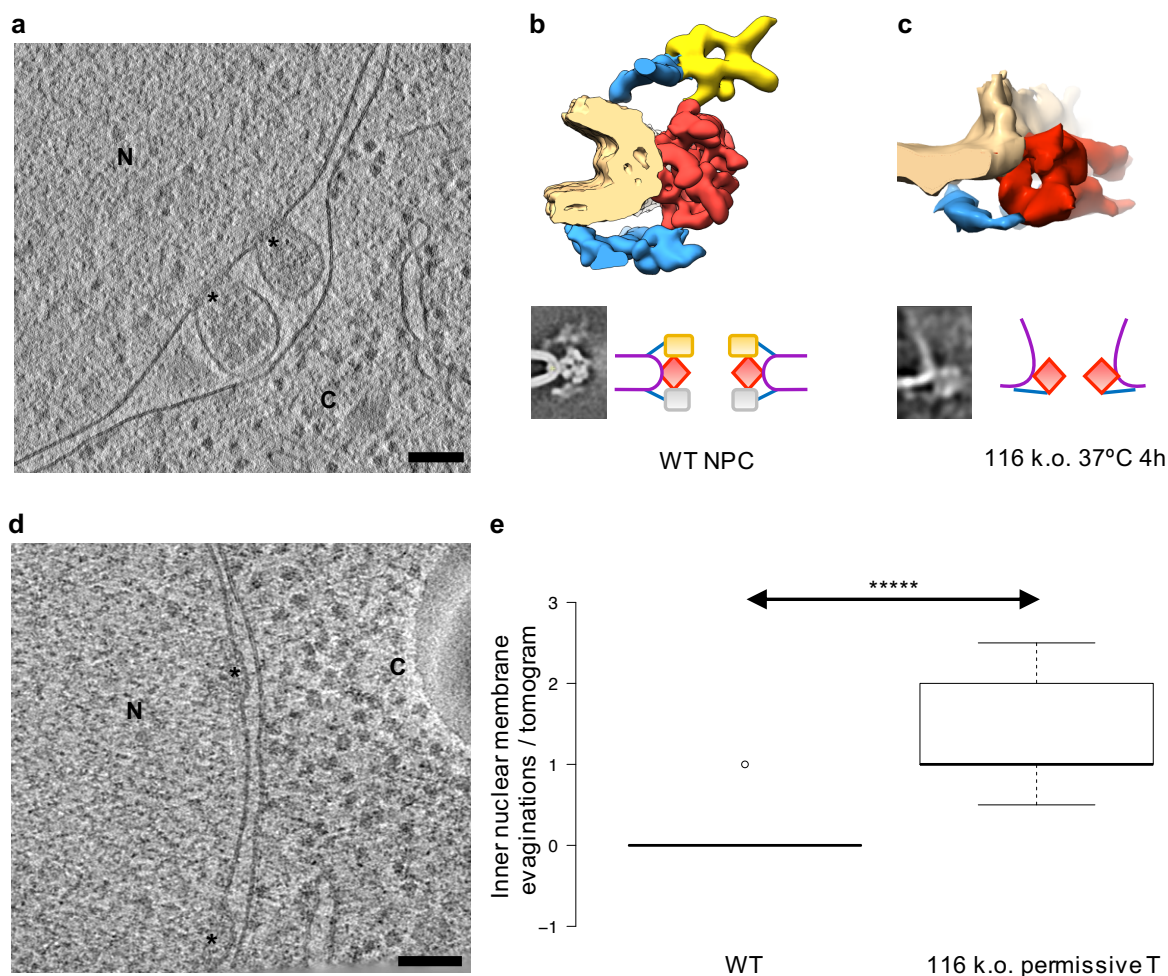

482  
 483 **Extended Data Fig. 6: NPC and nuclear envelope morphology under *nup116Δ* conditions. a,**  
 484 tomographic slice of nuclear envelope with herniations (*nup116Δ* 4h at 37°C); N is nucleus, C is  
 485 cytoplasm, stars depict density at the basis of the herniations that was subjected to subtomogram  
 486 averaging; scale bar: 100 nm. **b,** Map and cartoon model of an individual spoke of the WT ScNPC  
 487 as in Fig. 2a and Fig. 4, shown isosurface rendered and as slice. **c,** same as **b** but as result of the  
 488 subtomogram averaging at the basis of the herniations (see Methods). The average shows that the  
 489 cytoplasmic ring, including the Nup159 complex is missing. **d,** cryo tomographic slice of nuclear  
 490 envelope with inner nuclear membrane evagination depicted as stars (*nup116Δ* 25°C). Labels as  
 491 in **a.** **e,** Box plot (median, 1st quartile) showing that the number of inner nuclear membrane  
 492 evaginations are significantly higher in the NEs of *nup116Δ* cells at 25°C (28 in 130 cryo  
 493 tomograms) in comparison to WT envelopes (1 in 230 cryo tomograms);  $p < 0.00001$  (Mann  
 494 Whitney, two-sided).

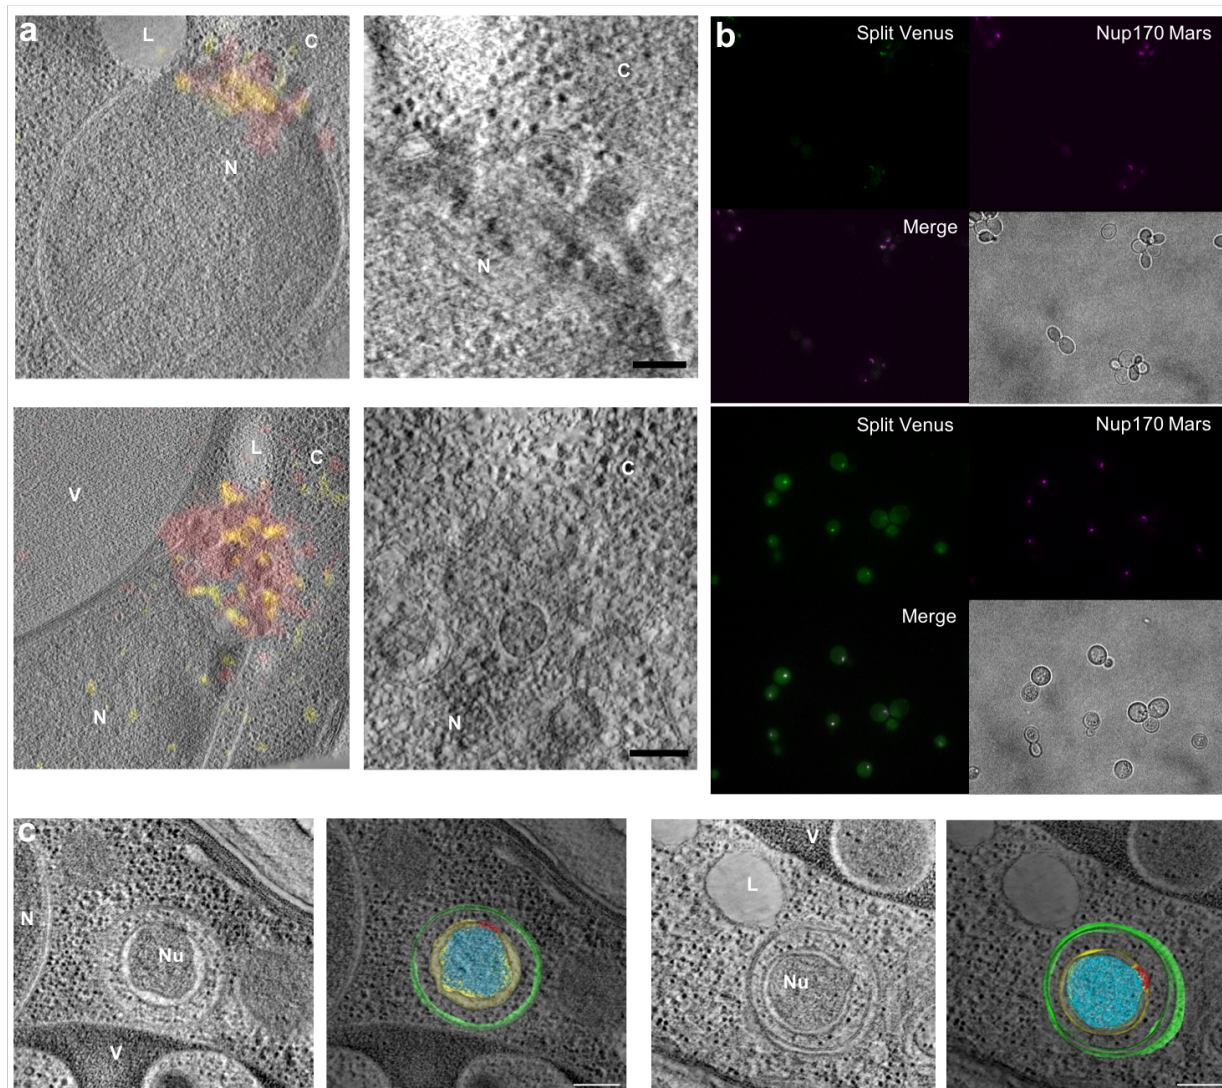

495  
 496 **Extended Data Fig. 7: Snapshots of selective autophagy at the nuclear envelope. a**, Gallery of  
 497 tomographic slices overlaid with fluorescence images as obtained by on section-CLEM of  
 498 Nup170-Mars, Nup159-Atg8-SplitVenus cells. The Nup159-Atg8 interaction is observed as the  
 499 yellow SplitVenus signal, Nup170-Mars is shown in red. In the right panel, zoomed views of the  
 500 same tomographic slices are shown, emphasizing the clustering of herniae and nuclear vesicles  
 501 arising through further membrane remodeling (See also Fig. 3 c-d and Supplementary Video 1). N  
 502 is nucleus, V is vacuole, L is lipid droplet, C is cytoplasm. Scale bar: 100 nm. **b**, Fluorescence and  
 503 phase contrast microscopy images of Nup170-Mars (magenta), Nup159-Atg8-SplitVenus (green)  
 504 cells before (top) and after 5,5h of nitrogen starvation (bottom). Upon starvation, Nup159-Atg8-  
 505 SplitVenus signal increases and co-localizes with Nup170-Mars (white dots). **c**, tomographic slice  
 506 (left) as well as the corresponding segmentation and isosurface rendering (right) of NPC-  
 507 containing nuclear vesicles (~340 nm in diameter) observed in the cytoplasm. They are surrounded  
 508 by cytosol content (ribosomes) and another two membranes (~540 nm in diameter). *Sce atg15Δ*



509 cells were starved for ~24 h to enrich NPC autophagy events. NPCs in red, Nuclear content (Nu)  
510 in cyan, autophagosomal double membranes in green. Scale bar: 200 nm.

511  
512  
513  
514  
515

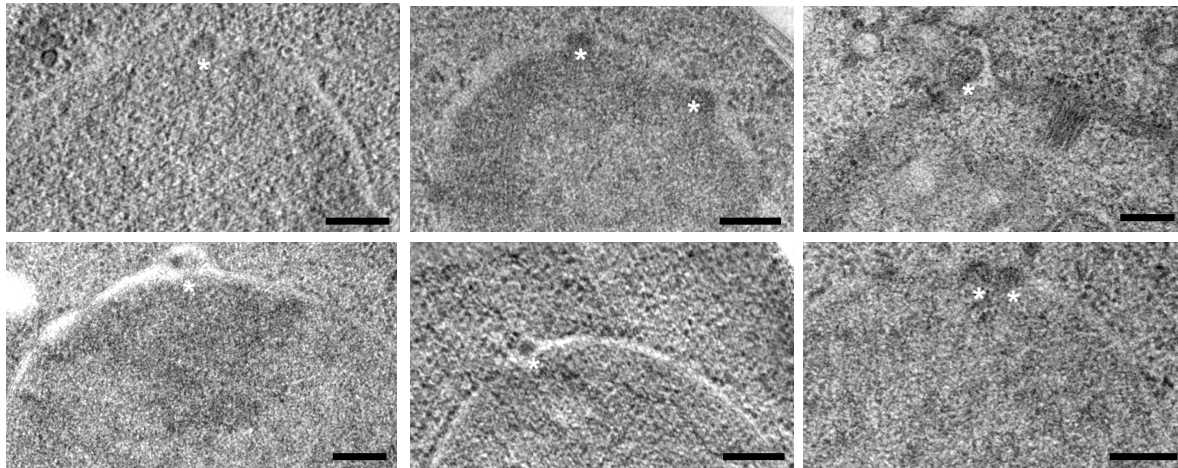

516  
517 **Extended Data Fig. 8: Herniations under *atg8Δ* conditions after 5h of nitrogen starvation.**  
518 Small herniations appears in the nuclear envelope and are marked with \*. Statistics in Figure 3b.  
519 Scale bar: 200 nm.

520

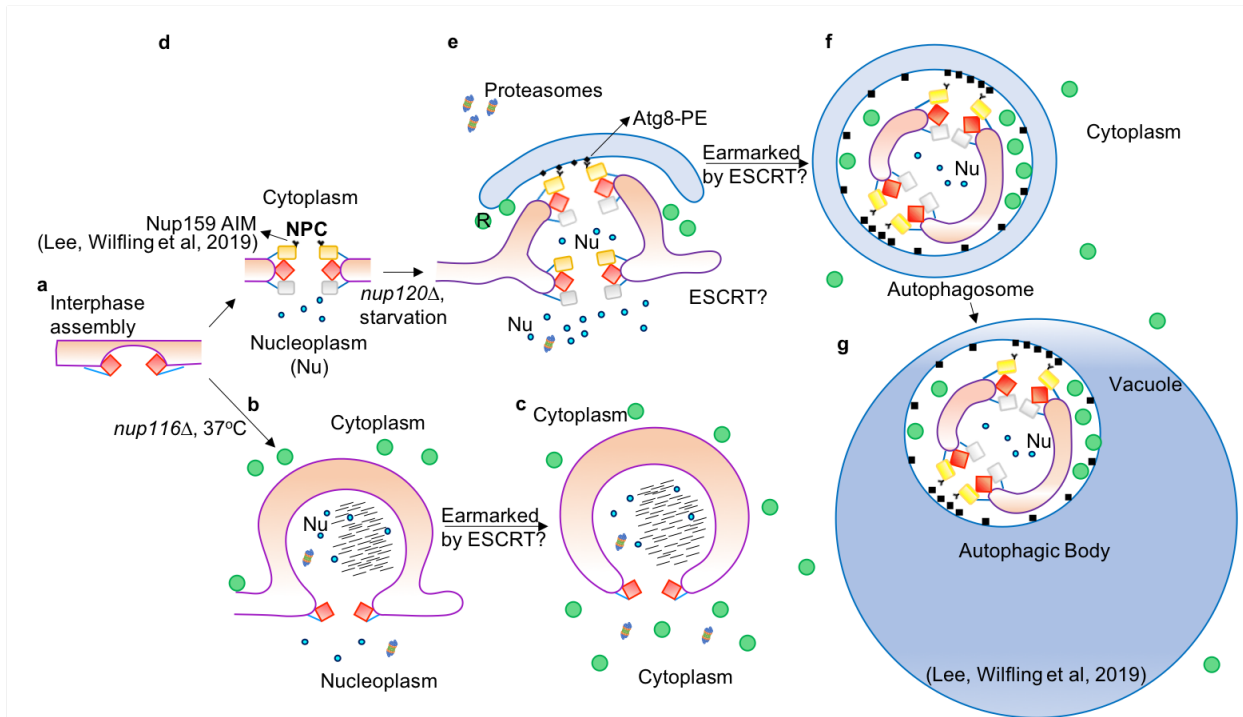

521

522

523

**Extended Data Fig. 9:** Cartoon summarizing the results from this paper and the accompanying paper Lee et al. Color code as in Fig. 4.

524 **Legends for Supplementary items**

525

526 **Video Supplementary 1: 3D cryo-CLEM tomogram of Nup159-Atg8 interaction.** The video  
527 shows how clustered NPCs depicted in red are surrounded by double membranes depicted in  
528 yellow after 5,5h starvation. Fig. 3b for statistics and 3d for scale bar.

529

530 **Video Supplementary 2: Cryo electron tomogram of *nup116Δ* strain #4 after shifting 5h to**  
531 **37°C shows budded herniae.** NPCs at the herniae are red, membranes are pink. Scale bar: 100  
532 nm.

533

534 **Extended Data Table 1: *S. cerevisiae* strains used in this study.**

535

536 **Source Data 1: Comparison of Cryo-EM maps of the *Sc*NPC.** Zip file for reviewers containing  
537 the in cell cryo-EM map of the *Sc*NPC (this study), the cryo-EM map (EMD-7321) of detergent  
538 extracted NPCs previously obtained by Kim et al. and a Chimera session that displays both drawn  
539 to scale at suggested contour level (in cell cryo-EM map in grey, EMD-7321 in cyan).

540 **Methods**

## 541 Yeast strains, growth conditions, fluorescence imaging

542 Strains used in this study are listed in Extended Data Table 1. Fresh cells were grown to mid-log  
543 phase in YPAD (1% Yeast Extract + 2% Peptone (YP), adenine (A), 2% Dextrose (D)). Nitrogen  
544 starvation was carried out by switching cells grown at OD<sub>600</sub> ~0.5 with YPAD into SD-N medium  
545 (synthetic minimal medium lacking nitrogen; 0.17% yeast nitrogen base, without aminoacids and  
546 ammonium sulfate, supplemented with 2% glucose) for indicated times. Fluorescent images of  
547 unfixed yeast cells upon starvation (strains #2, 3) were acquired using a Zeiss Axio Observer. Co-  
548 localization figure was made in FIJI<sup>38</sup>.

549

## 550 Correlative fluorescence and electron tomography in plastic sections

551 CLEM analysis was conducted as previously described<sup>39,40</sup>. *S cerevisiae* (*Sc*) cells strain #2 after  
552 ~5h of starvation were high pressure frozen (HPM010, AbraFluid) and freeze substituted (EM-  
553 AFS2, Leica) with 0.1% uranyl acetate in acetone for 55h at -90°C. The temperature was then  
554 raised to -45°C at 3.5°C/h and samples were further incubated for 5h. After rinsing in acetone, the  
555 samples were infiltrated in Lowicryl HM20 and the resin was polymerized under UV light. 300  
556 nm sections were cut with a microtome (EM UC7, Leica) and placed on carbon coated 200 mesh  
557 copper grids (S160, Plano).

558 The fluorescence microscopy (FM) imaging of the sections was carried out as previously  
559 described<sup>36,40</sup> using a widefield fluorescence microscope (Olympus IX81) equipped with an  
560 Olympus PlanApo 100X 1.40 NA oil immersion objective and a CCD camera (Orca-ER;  
561 Hamamatsu Photonics).

562 After fluorescence imaging, grids were poststained with uranyl acetate and lead citrate. 15 nm  
563 protein A-coupled gold beads were also added as fiducial markers used for overlaying low-mag  
564 with high-mag tomograms. 60° to 60° tilt series of the cells of interest were acquired semi-  
565 automatically on a Tecnai F30 (Thermofisher, FEI) at 300 kV with Serial-EM<sup>41</sup> at 20000x and at  
566 4700x to facilitate ease of correlation.

567 Tomograms were reconstructed automatically with IMOD batchruntomo<sup>42</sup>. Tilts were aligned by  
568 patch tracking. 3DMOD software was used for manual segmentation of the tomograms and for  
569 making the videos. Overlays of fluorescence spots and tomograms was performed with ec-CLEM  
570 Plugin<sup>43</sup> in ICY<sup>44</sup> by clicking manually on corresponding pairs of notable features in the two  
571 imaging modalities.

572

## 573 2D electron microscopy

574 Strains #1, 2, 3, 5 upon starvation were high pressure frozen as described above and freeze  
575 substituted with 0.2% uranyl acetate 0.1% glutaraldehyde in acetone for 60h at -90°C. The  
576 temperature was then raised to -45°C at 3°C/h and samples were further incubated for 9h. After  
577 rinsing in acetone, the samples were infiltrated in Lowicryl HM20 resin and the resin was  
578 polymerized under UV light. Acquisition was performed with a Tecnai F30 (Thermofisher, FEI)  
579 at 300 kV. Herniation counting was performed using 2D electron microscopy of 70-100 nm

580 sections and 3D electron microscopy using 300 nm sections. Boxplots were done with BoxPlotR  
581 (<http://shiny.chemgrid.org/boxplotr/>) using around 150 nuclei counted per each strain or condition.

582

583 Cryo-FIB milling and cryo-CLEM

584 *Sc* wild type strain #1 and knock-out #4 were grown in YPAD liquid medium to an OD<sub>600</sub> of 0.2  
585 at 30°C, OD 0.5 for correlative studies using strain #2. Per grid, 3.5µl of cell suspension were  
586 applied on 200-mesh copper grids coated with R 2/1 holey carbon or SiO<sub>2</sub> films (Quantifoil Micro  
587 Tools GmbH) and plunge frozen in liquid ethane at ~-186°C using a Leica EM GP grid plunger.  
588 The blotting chamber conditions were adjusted to 30°C, 95% humidity and 1,5-2 seconds blotting  
589 time. For cryo-CLEM, Crimson FluoSpheres™ Carboxylate-Modified Microspheres, 1.0 µm,  
590 crimson fluorescent (625/645), were washed in 1×PBS and added to the cell suspension at 1:20  
591 dilution, and 1 second blotting time was used.

592 The frozen grids were fixed in modified autogrids to allow milling at a shallow angle<sup>45</sup> and  
593 transferred into an Aquilos (cryo-FIB-SEM dual beam, Thermofisher). For correlative studies, the  
594 clipped grids were imaged on a prototype Leica cryo-confocal microscope based on Leica TCS  
595 SP8 CFS equipped with a Cryo Stage (similar to the commercially available EM Cryo CLEM  
596 Widefield system). Imaging was performed using a 50× objective, NA 0.90, 552 nm laser  
597 excitation, and detecting simultaneously at 560–620 nm and 735–740 nm.

598 In the Aquilos, samples were sputter-coated with inorganic platinum and coated with an  
599 organometallic protective platinum layer using the Aquilos gas injection system (GIS)<sup>46</sup>. Lamellae  
600 were produced using the Gallium ion beam at 30 kV and stage tilt angles of 17°-19° by milling in  
601 two parallel rectangular patterns. The lamella preparation was conducted in a step-wise fashion,  
602 gradually reducing the current of the ion beam until the final polishing of a thin slab of biological  
603 material of around 150-250 nm.

604 For correlative studies, beads (5 to 10) were picked in the squares of interested and overlaid with  
605 fluorescence signals coming from the confocal stacks using 3DCT in both the electron and ion  
606 beam images<sup>37</sup>. After choosing the signal of interest in the confocal stacks, 3DCT provides the  
607 position to place the milling patterns in x, y and zed. Milling is then performed as described above.  
608 After polishing, the signal of interest is retained in the lamellae provided that the milling did not  
609 result in deformation of the carbon film.

610 Autogrids with lamellae were unloaded and placed in storage boxes. In some cases, a further  
611 inorganic Pt layer was added for reducing charging during TEM imaging.

612

613 Cryo-electron tomography data collection and processing

614 Grids with lamellae were loaded into the Krios cassette. Cryo-electron tomographic tilt series (TS)  
615 were acquired on a Titan Krios (Thermofisher FEI) operating at 300 kV equipped with a Gatan K2  
616 summit direct electron detector and energy filter. The autogrids were carefully loaded with the  
617 lamella orientation perpendicular to the tilt-axis of the microscope prior to TS acquisition.

618 Lamellae were mapped at low mag (2 nm/pix, 30 kV slit) and for correlative studies the maps were  
619 overlaid with the electron beam images from the Aquilos using serialEM registration points. Spots  
620 of interested were chosen accordingly.

621 All data was collected using the K2 operating in dose-fractionation mode at 4k x 4k resolution  
622 with a nominal pixel size of 0.34 nm. TS collection was automated at using a modified version of  
623 the dose-symmetric scheme<sup>47</sup> taking the lamella pre-tilt into account. Defocus TS were acquired  
624 over a tilt range of +65 to -45 for a positive pre-tilt with a tilt increment of 2-3°, a total dose of  
625 ~140 e-/Å<sup>2</sup> and a targeted defocus of around 2 to 4.5 μm.

626 All images were pre-processed and dose-filtered as described in<sup>11</sup>. Tilt-series alignment was  
627 performed using IMOD software package 4.9.2.<sup>42</sup>, by patch tracking function on bin4 image  
628 stacks. Initial tilt series alignment was manually inspected and improved by removing contours  
629 showing large deviations (i.e. a large mean residual error) from the alignment model function. The  
630 software package gCTF<sup>48</sup> was used for CTF estimation. 3dCTF correction and tomogram  
631 reconstruction was performed with NovaCTF<sup>49</sup>.

632

### 633 Subtomogram alignment and averaging

634 Subtomogram alignment and averaging was performed with slight modifications from a previously  
635 described workflow<sup>50</sup> using the Matlab TOM package re-implemented in C++. In brief: Particle  
636 coordinates and initial orientations were manually picked and assigned. Initial NPC alignment was  
637 performed on 8 and 4 times binned subtomograms followed by a manual inspection and curation  
638 of the initial alignment for each particle. From the whole aligned NPCs all 8 spokes were assigned  
639 according to an 8-fold rotational symmetry and the subunits were extracted from the tomograms  
640 removing subunits which are located outside of the lamellae. Subunits were further aligned. The  
641 alignment was once more manually inspected, and all misaligned subunits were removed. Final  
642 alignments were done binning two times the subtomograms using focused masks on the  
643 cytoplasmic, inner and nucleoplasmic ring of the NPC.

644 In the *S. cerevisiae* wild type data set ~500 NPC (4000 asymmetric units) were initially picked  
645 from ~230 tomograms, ~200 NPCs (1600 asymmetric units) from 120 tomos for the *nup116Δ*  
646 strain at permissive temperature and ~40 NPCs from 40 tomos for the *nup116Δ* strain at not-  
647 permissive temperature (37°C). The particles were split in two half datasets for gold-standard  
648 processing. After alignment and manual curation 2000 subunits were used in the final average for  
649 the WT NPC and ~800 for the *nup116Δ* at permissive temperature and 320 for the *nup116Δ* strain  
650 at 37°C. For the latter NPCs filtered volumes were used for alignment and weighted back  
651 projection volumes to get the final structure. Gold standard Fourier shell correlation (FSC) was  
652 calculated with Fourier Shell Correlation Server  
653 ([www.ebi.ac.uk/pdbe/emdb/validation/fsc/results/](http://www.ebi.ac.uk/pdbe/emdb/validation/fsc/results/)) with half-maps as inputs. Local resolution was  
654 calculated with Resmap<sup>51</sup>, B-factor sharpening was estimated empirically as in<sup>9</sup> being between  
655 2000 Å<sup>2</sup> for the inner ring and 3000 Å<sup>2</sup> for the cytoplasmic ring. For counting the number of inner  
656 nuclear membrane evaginations (Extended Data Fig. 6d-e), all the WT tomograms and ~120  
657 tomograms from *nup116Δ* cells at permissive temperature were used.

658

659 Systematic fitting of ScNPC components to the cryo-ET map

660 An unbiased systematic (global) fitting approach was performed using structural models of various  
 661 ScNPC subcomplexes derived from previously published structures<sup>3,13</sup>. All structural models were  
 662 low-pass filtered to 40 Å prior the fitting. The resulting model maps were then independently fitted  
 663 into the ScNPC cryo-EM map using global fitting as implemented in UCSF Chimera<sup>52</sup>. The fitting  
 664 of the Y complex structures and Nup159 complex was performed for the isolated maps of the  
 665 cytoplasmic and nuclear rings. The inner ring model was fitted to the IR map. The nuclear envelope  
 666 density was erased prior to the fitting. The regions of the nuclear envelope distant from apparent  
 667 contact points between membrane and protein densities were erased prior to the fitting to eliminate  
 668 fits significantly overlapping with the membrane. All fitting runs were performed using 100,000  
 669 random initial placements and the requirement of at least 30% of the model map to be covered by  
 670 the ScNPC density envelope defined at low threshold. For each fitted model, this procedure yielded  
 671 between 500-17,000 fits after clustering.

672 For fitting the filtered atomic models, the cross-correlation about the mean (cam score, equivalent  
 673 to Pearson correlation) score from UCSF Chimera was used as a fitting metric as in our previous  
 674 work<sup>9,10,11,12</sup>.

675

$$676 \quad cam = \frac{\langle \mathbf{u} - \mathbf{u}_{ave} | \mathbf{v} - \mathbf{v}_{ave} \rangle}{|\mathbf{u} - \mathbf{u}_{ave}| |\mathbf{v} - \mathbf{v}_{ave}|}$$

677 where  $\mathbf{u}_{ave}$  is a vector with all components equal to the average of the components of  $\mathbf{u}$  and  $\mathbf{v}_{ave}$  is  
 678 defined analogously.

679 The negative stain map of the Nup159 complex was fitted using Chimera's cross-correlation about  
 680 zero (equivalent to cosine similarity).

$$681 \quad cc = \frac{\langle \mathbf{u} | \mathbf{v} \rangle}{|\mathbf{u}| |\mathbf{v}|}$$

682

683 This score was used instead of the cam score because the cam score tests the linear dependence of  
 684 the two fitted maps, which is not the case when fitting negative stain maps, which contain the  
 685 signal of the electron density at the surface of the complex.

686 To confirm this fit, the Nup159 complex was also fitted using the colors program from the Situs  
 687 package<sup>54</sup> with settings appropriate for low resolution negative stain maps (i.e. using Laplacian  
 688 filtering that emphasizes on contour matching over interior volume matching).

689 For each fitting run, the statistical significance of the fits was assessed as a p-value calculated from  
 690 the normalized cross-correlation scores. To calculate the p-values, the cross-correlation scores  
 691 were first transformed to z-scores (Fisher's z-transform) and centered, from which two-sided p-  
 692 values were computed using standard deviation derived from an empirical null distribution  
 693 (derived from all obtained fits and fitted using fdrtool<sup>55</sup> R-package). All p-values were corrected  
 694 for multiple testing using Benjamini-Hochberg procedure. Figures were made using UCSF  
 695 Chimera<sup>52</sup> and Xlink Analyzer<sup>56</sup>.



696

## 697 Integrative modeling

698 To build the integrative model of ScNPC, the IR model from<sup>13</sup> was fitted as a rigid body using the  
 699 procedure described above. The models of Y-complex fitted into CR and NR could not be obtained  
 700 by rigid body fitting of the published models<sup>13</sup>. Therefore, we have divided the available crystal  
 701 structures and homology models<sup>13</sup> into six smaller rigid bodies (with cut points corresponding to  
 702 boundaries of published crystal structures of Y-subcomplexes) and fitted them simultaneously into  
 703 the cryo-EM maps of the CR and NR using the integrative modeling procedure implemented with  
 704 using Integrative Modeling Platform<sup>57</sup> version 2.9.0 as described previously by<sup>11,53</sup>. Firstly, each  
 705 of the rigid bodies has been independently fitted to the EM map using UCSF Chimera<sup>52</sup> as  
 706 described above (structural models were low-pass filtered to 40 Å) to generate libraries of  
 707 alternative fits for each rigid body. Then, we generated configurations of all the rigid bodies by  
 708 recombining the above fits using simulated annealing Monte Carlo optimization. Each  
 709 configuration was generated by an independent Monte Carlo optimization comprising 30,000 steps  
 710 resulting in total 20,000 models and scored. The scoring function for the optimization was a linear  
 711 combination of the normalized EM cross-correlation scores of the precalculated domain fits,  
 712 domain connectivity restraint, a term preventing overlap of the Y components with the nuclear  
 713 envelope and the assigned Nup159 complex density) and clash score (see ref.<sup>11</sup> for the  
 714 implementation details). The structures were simultaneously represented at two resolutions: in C $\alpha$ -  
 715 only representation and a coarse-grained representation, in which each 10-residue stretch was  
 716 converted to a bead. The 10-residue bead representation was used for the clash score to increase  
 717 computational efficiency, the C $\alpha$ -only representation was used for crosslinking and domain  
 718 connectivity restraints. Since the EM restraint was derived from the original EM fits generated  
 719 with UCSF Chimera, it was derived from the full atom representation. The final models for  
 720 visualization were selected as the top scoring model.

721

- 722 38. J. Schindelin, I. Arganda-Carreras, E. Frise, V. Kaynig, M. Longair, T. Pietzsch, S.  
 723 Preibisch, C. Rueden, S. Saalfeld, B. Schmid, J.-Y. Tinevez, D. J. White, V. Hartenstein,  
 724 K. Eliceiri, P. Tomancak, A. Cardona, Fiji: an open-source platform for biological-image  
 725 analysis. *Nat. Methods*. **9**, 676–82 (2012).
- 726 39. D. J. Thaller, M. Allegretti, S. Borah, P. Ronchi, M. Beck, C. P. Lusk, An ESCRT-LEM  
 727 protein surveillance system is poised to directly monitor the nuclear envelope and nuclear  
 728 transport system. *Elife*. **8**, 1–36 (2019).
- 729 40. B. Hampoelz, M. T. Mackmull, P. Machado, P. Ronchi, K. H. Bui, N. Schieber, R.  
 730 Santarella-Mellwig, A. Necakov, A. Andrés-Pons, J. M. Philippe, T. Lecuit, Y. Schwab,  
 731 M. Beck, Pre-assembled Nuclear Pores Insert into the Nuclear Envelope during Early  
 732 Development. *Cell*. **166**, 664–678 (2016).
- 733 41. D. N. Mastronarde, Automated electron microscope tomography using robust prediction  
 734 of specimen movements. *J. Struct. Biol.* **152**, 36–51 (2005).
- 735 42. J. R. Kremer, D. N. Mastronarde, J. R. McIntosh, Computer visualization of three-  
 736 dimensional image data using IMOD. *J. Struct. Biol.* **116**, 71–76 (1996).
- 737 43. P. Paul-Gilloteaux, X. Heiligenstein, M. Belle, M.-C. Domart, B. Larijani, L. Collinson,  
 738 G. Raposo, J. Salamero, Erratum: Corrigendum: eC-CLEM: flexible multidimensional

- 739 registration software for correlative microscopies. *Nat. Methods*. **14**, 323–323 (2017).
- 740 44. F. De Chaumont, S. Dallongeville, N. Chenouard, N. Hervé, S. Pop, T. Provoost, V.
- 741 Meas-Yedid, P. Pankajakshan, T. Lecomte, Y. Le Montagner, T. Lagache, A. Dufour, J.
- 742 C. Olivo-Marin, Icy: An open bioimage informatics platform for extended reproducible
- 743 research. *Nat. Methods*. **9**, 690–696 (2012).
- 744 45. A. Rigort, F. J. B. Bauerlein, E. Villa, M. Eibauer, T. Laugks, W. Baumeister, J. M.
- 745 Plitzko, Focused ion beam micromachining of eukaryotic cells for cryoelectron
- 746 tomography. *Proc. Natl. Acad. Sci.* **109**, 4449–4454 (2012).
- 747 46. M. Schaffer, J. Mahamid, B. D. Engel, T. Laugks, W. Baumeister, J. M. Plitzko,
- 748 Optimized cryo-focused ion beam sample preparation aimed at in situ structural studies of
- 749 membrane proteins. *J. Struct. Biol.* **197**, 73–82 (2017).
- 750 47. W. J. H. Hagen, W. Wan, J. A. G. Briggs, Implementation of a cryo-electron tomography
- 751 tilt-scheme optimized for high resolution subtomogram averaging. *J. Struct. Biol.* **197**,
- 752 191–198 (2017).
- 753 48. K. Zhang, Gctf: Real-time CTF determination and correction. *J. Struct. Biol.* **193**, 1–12
- 754 (2016).
- 755 49. B. Turoňová, F. K. M. Schur, W. Wan, J. A. G. Briggs, Efficient 3D-CTF correction for
- 756 cryo-electron tomography using NovaCTF improves subtomogram averaging resolution to
- 757 3.4 Å. *J. Struct. Biol.* **199**, 187–195 (2017).
- 758 50. M. Beck, V. Lůí, F. Förster, W. Baumeister, O. Medalia, Snapshots of nuclear pore
- 759 complexes in action captured by cryo-electron tomography. *Nature*. **449**, 611–615 (2007).
- 760 51. A. Kucukelbir, F. J. Sigworth, H. D. Tagare, Quantifying the local resolution of cryo-EM
- 761 density maps. *Nat. Methods*. **11**, 63–65 (2014).
- 762 52. E. F. Pettersen, T. D. Goddard, C. C. Huang, G. S. Couch, D. M. Greenblatt, E. C. Meng,
- 763 T. E. Ferrin, UCSF Chimera--a visualization system for exploratory research and analysis.
- 764 *J. Comput. Chem.* **25**, 1605–12 (2004).
- 765 53. M. I. Dauden, J. Kosinski, O. Kolaj-Robin, A. Desfosses, A. Ori, C. Faux, N. A.
- 766 Hoffmann, O. F. Onuma, K. D. Breunig, M. Beck, C. Sachse, B. Séraphin, S. Glatt, C. W.
- 767 Müller, Architecture of the yeast Elongator complex. *EMBO Rep.* **18**, 264–279 (2017).
- 768 54. W. Wriggers, Conventions and workflows for using Situs. *Acta Crystallogr. Sect. D Biol.*
- 769 *Crystallogr.* **68**, 344–351 (2012).
- 770 55. K. Strimmer, fdrtool: A versatile R package for estimating local and tail area-based false
- 771 discovery rates. *Bioinformatics*. **24**, 1461–1462 (2008).
- 772 56. J. Kosinski, A. von Appen, A. Ori, K. Karius, C. W. Müller, M. Beck, Xlink analyzer:
- 773 Software for analysis and visualization of cross-linking data in the context of three-
- 774 dimensional structures. *J. Struct. Biol.* **189**, 177–183 (2015).
- 775 57. B. Webb, S. Viswanath, M. Bonomi, R. Pellarin, C. H. Greenberg, D. Saltzberg, A. Sali,
- 776 Integrative structure modeling with the Integrative Modeling Platform. *Protein Sci.* **27**,
- 777 245–258 (2018).
- 778
- 779

## 780 Acknowledgments

781 We thank members of the Beck Lab, Mahamid Lab and EMBL’s electron microscopy core facility

782 for invaluable input and support. We thank Leica for collaboration to develop the prototype cryo-

783 confocal. We thank Amparo-Andres Pons, David Thaller, Patrick Lusk and Ed Hurt for critical  
784 discussions and for providing relevant strains. We thank Jiameng Sun for help in tomographic  
785 segmentation. The computational part of this work has been done on the High-Performance Cluster  
786 of the EMBL, supported by the EMBL Heidelberg IT Services. This work was supported by ERC  
787 Complex Assembly (MB and MA); MA was funded by an EMBO a long-term fellowship (ALTF-  
788 1389–2016); JM received funding from the European Research Council (ERC 3DCellPhase  
789 760067); KHF is supported by a fellowship from the EMBL Interdisciplinary (EI3POD)  
790 programme under Marie Skłodowska-Curie Actions COFUND (664726). MB acknowledges  
791 funding by EMBL, the Max Planck Society and the European Research Council  
792 (ComplexAssembly 724349).

### 793 **Author Contributions**

794 MA, CEZ conceived the project, designed experiments, collected data, analyzed data, wrote the  
795 manuscript. VR analyzed data, performed computational analysis, wrote the manuscript. FW, PR  
796 designed experiments, collected data, analyzed data. HKHF, CWL, XZ collected data, analyzed  
797 data. WH collected data. BT analyzed data. KK performed computational analysis. CWM, JM, YS  
798 supervised the project. BP, JK, MB conceived the project, designed experiments, supervised the  
799 project, wrote the manuscript.

800

### 801 **Depositions**

802 The EM maps associated with this manuscript will be deposited in Electron Microscopy Data Bank  
803 upon publication. The integrative model of ScNPC will be deposited in PDB-dev ([https://pdb-  
804 dev.wwpdb.org/](https://pdb-dev.wwpdb.org/)). An in cell cryo-EM map of the ScNPC is attached for the review process (Source  
805 Data 1).
